# Supplementary material for: Influence of the aromatic moiety in α- and β-arylalanines on their biotransformation with phenylalanine 2,3-aminomutase from Pantoea agglomerans
Source: Royal Society of Chemistry journal article supplement (doi:10.1039/c6ra02964g), 2016-01-01
Supplement: c6ra02964g1.pdf [file c6ra02964g1.pdf]

## SUPPORTING INFORMATION

### **Influence of the aromatic moiety in $\alpha$ - and $\beta$ -arylalanines on their biotransformation with phenylalanine 2,3-aminomutase from *Pantoea agglomerans*<sup>†</sup>**

A. Varga<sup>a</sup>, G. Bánóczy<sup>b</sup>, B. Nagy<sup>a</sup>, L. C. Bencze<sup>a</sup>, M. I. Toşa<sup>a</sup>, Á. Gellért<sup>c</sup>, F. D. Irimie<sup>a</sup>, J. Rétey<sup>d</sup>,  
L. Poppe<sup>b\*,e</sup> and C. Paizs<sup>a\*</sup>

#### **Table of Contents**

|                                                                                                                                                  |    |
|--------------------------------------------------------------------------------------------------------------------------------------------------|----|
| 1. <sup>1</sup> H- and <sup>19</sup> F-NMR spectra of the enzymatic transformations .....                                                        | 2  |
| 2. HPLC monitoring of the enzymatic reactions .....                                                                                              | 12 |
| 2.1 Determination of conversion and molar fraction values .....                                                                                  | 12 |
| 2.2 HPLC analysis of the <i>Pa</i> PAM-catalysed reactions after 20 h .....                                                                      | 14 |
| 3. Time-course profiles of the <i>Pa</i> PAM-catalysed reactions .....                                                                           | 18 |
| 4. HPLC determination of the enantiomeric compositions .....                                                                                     | 22 |
| 5. Enzymatic reaction starting from (±)- $\beta$ -phenylalanine <b>2a</b> and ( <i>S</i> )- $\beta$ -phenylalanine ( <i>S</i> )- <b>2a</b> ..... | 38 |

## 1. $^1\text{H}$ - and $^{19}\text{F}$ -NMR spectra of the enzymatic transformations

Results presented in Table 1 and Table 2 (see main manuscript) show the relative molar fractions for each component of enzymatic reaction mixtures, calculated from the integral values of the clearly distinguishable  $^1\text{H}$ - or  $^{19}\text{F}$ -NMR signals assigned for each substance.

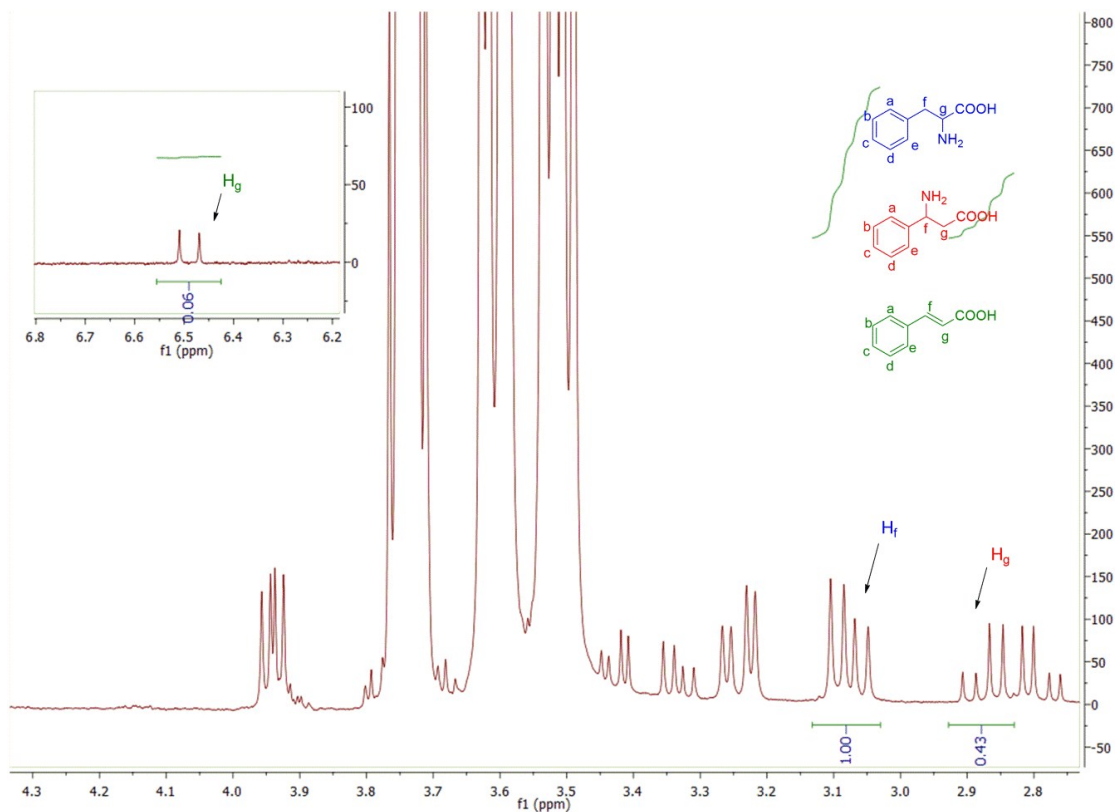

$^1\text{H}$ -NMR of the products of *PaPAM*-catalysed transformation of ( $\pm$ )- $\alpha$ -phenylalanine *rac*-**1a**

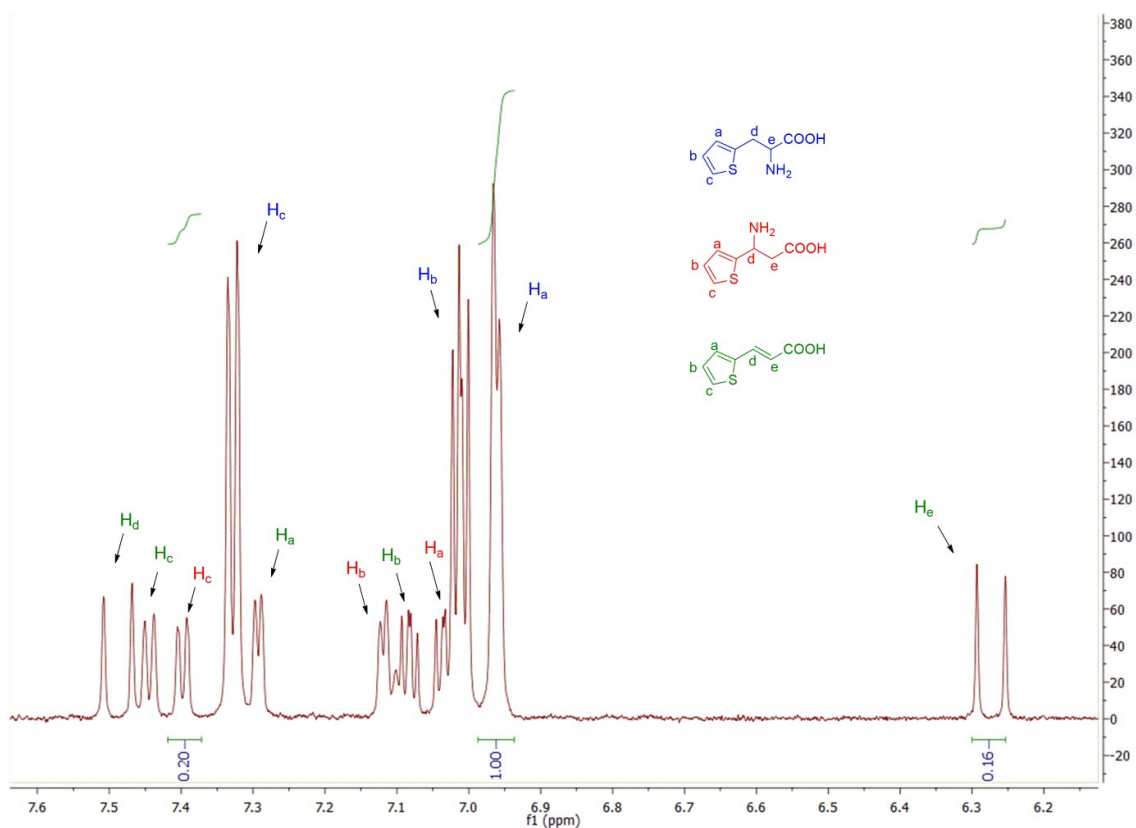

<sup>1</sup>H-NMR of the products of PaPAM-catalysed transformation of (±)-α-(thiophen-2-yl)alanine *rac-1b*

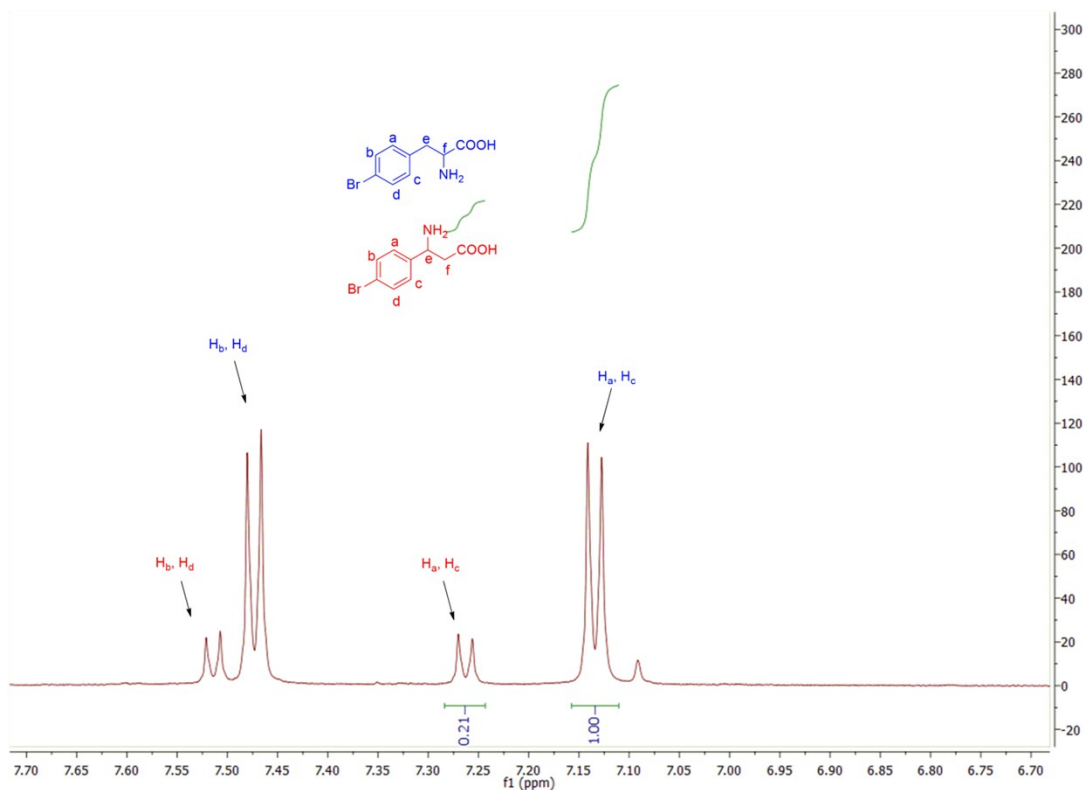

<sup>1</sup>H-NMR of the products of PaPAM-catalysed transformation of (±)-4-bromo-α-phenylalanine *rac-1c*

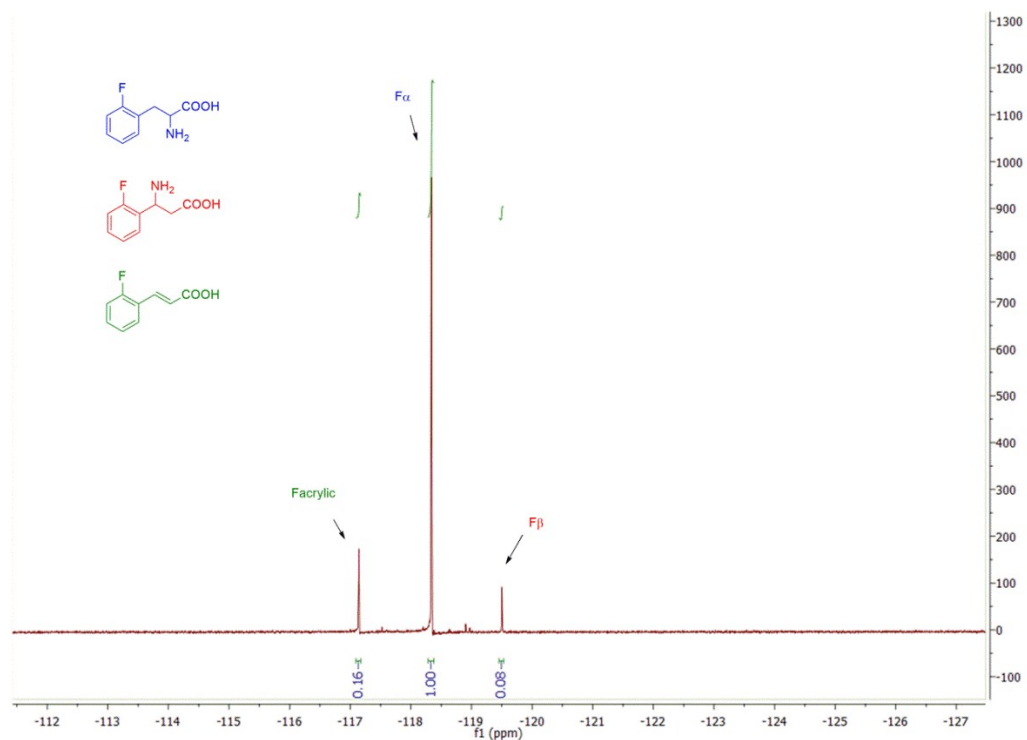

<sup>19</sup>F-NMR of the products of *PaPAM*-catalysed transformation of (±)-2-fluoro-α-phenylalanine *rac-1d*

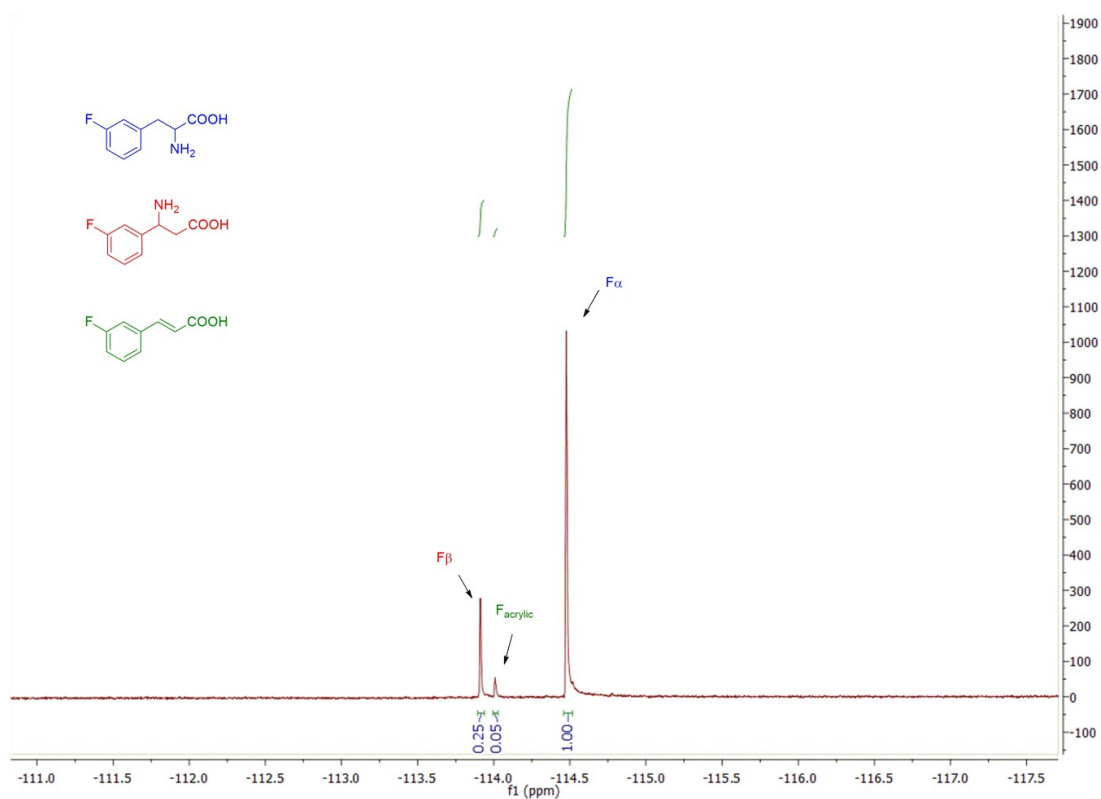

<sup>19</sup>F-NMR of the products of *PaPAM*-catalysed transformation of (±)-3-fluoro-α-phenylalanine *rac-1e*

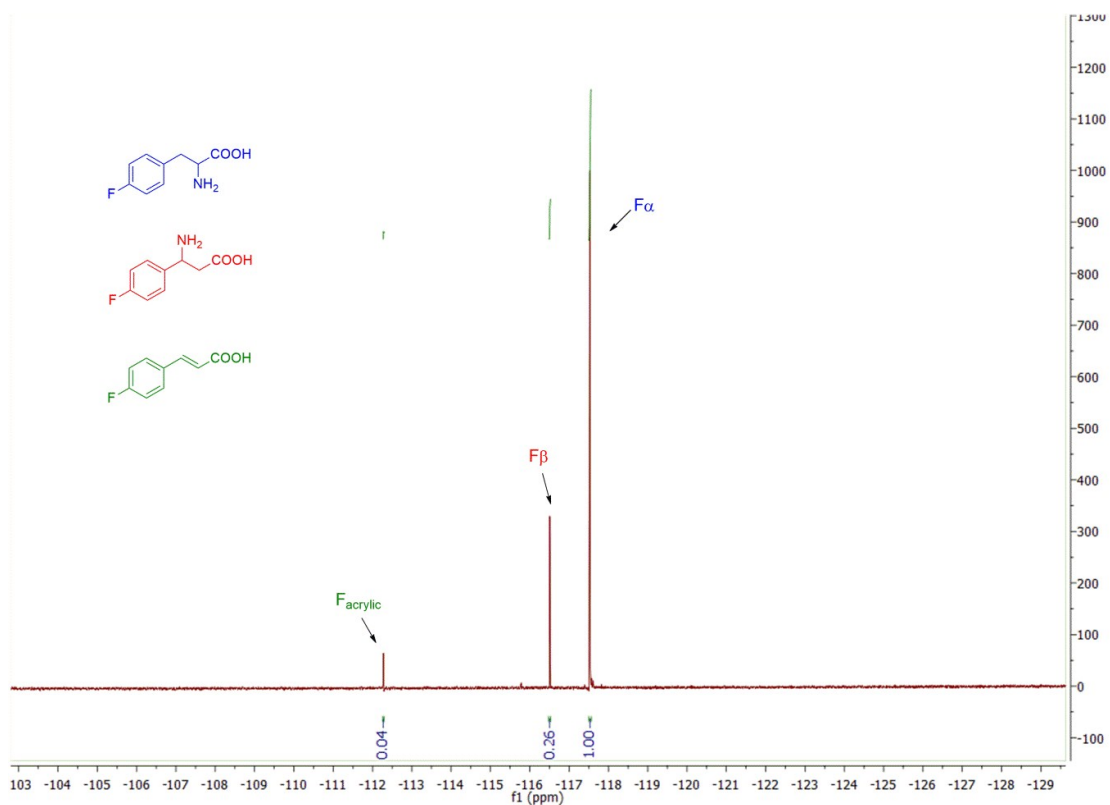

<sup>19</sup>F-NMR of the products of *PaPAM*-catalysed transformation of (±)-4-fluoro- $\alpha$ -phenylalanine *rac-1f*

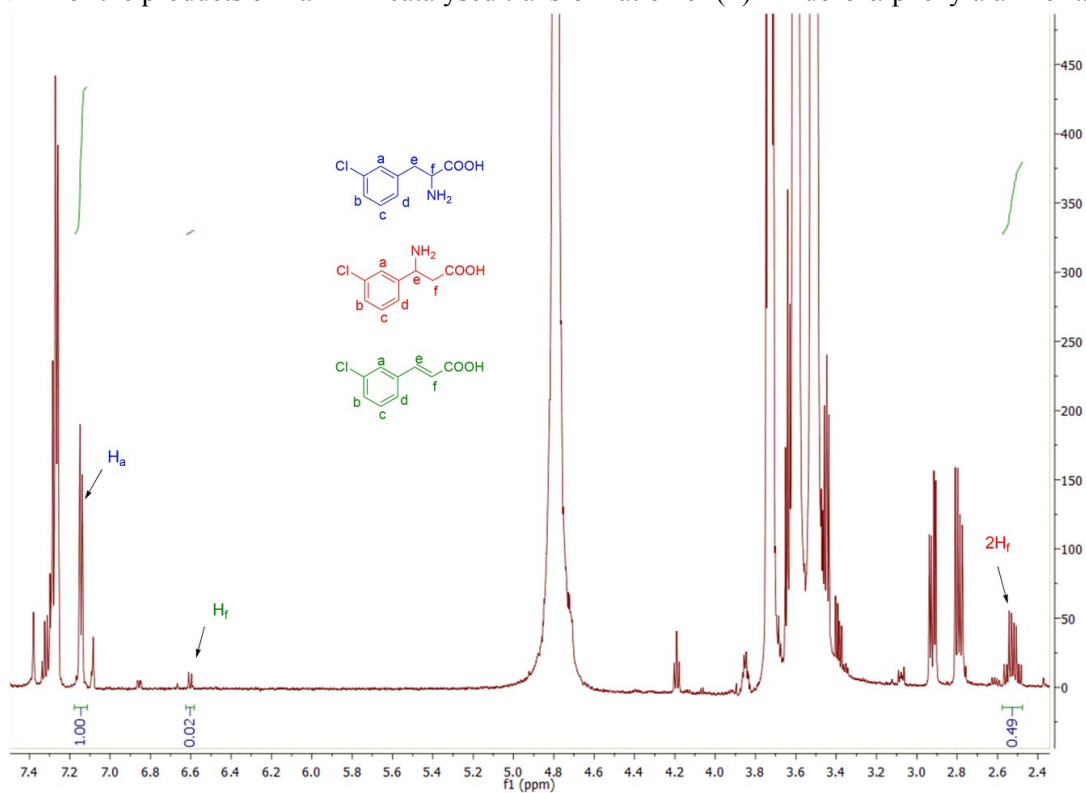

<sup>1</sup>H-NMR of the products of *PaPAM*-catalysed transformation of (±)-3-chloro- $\alpha$ -phenylalanine *rac-1h*

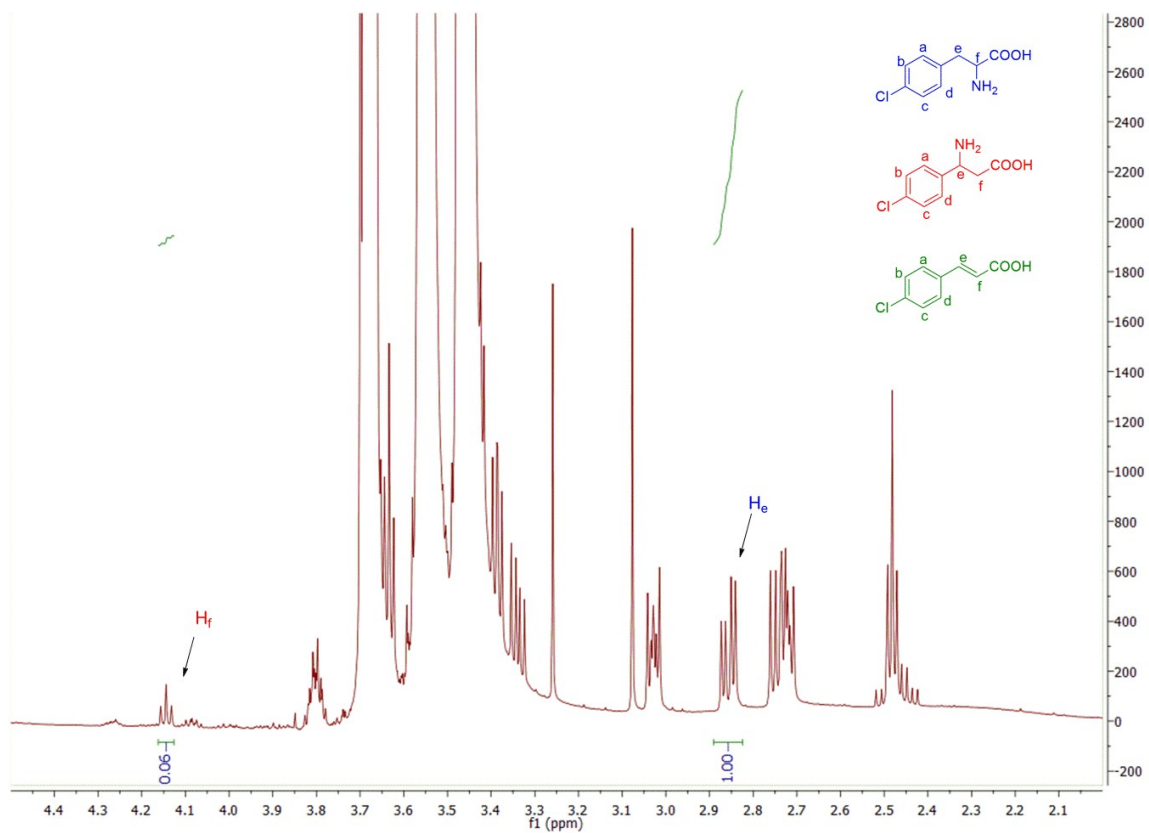

$^1\text{H-NMR}$  of the products of *PaPAM*-catalysed transformation of ( $\pm$ )-4-chloro- $\alpha$ -phenylalanine *rac-1i*

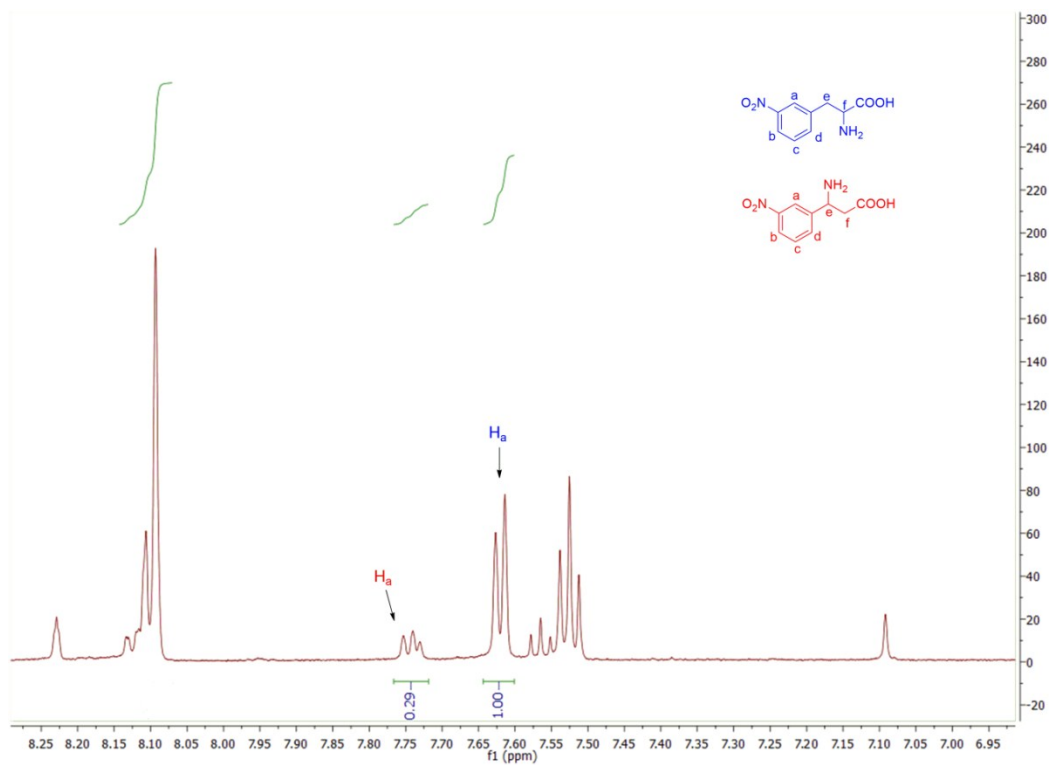

$^1\text{H-NMR}$  of the products of *PaPAM*-catalysed transformation of ( $\pm$ )-3-nitro- $\alpha$ -phenylalanine *rac-1k*

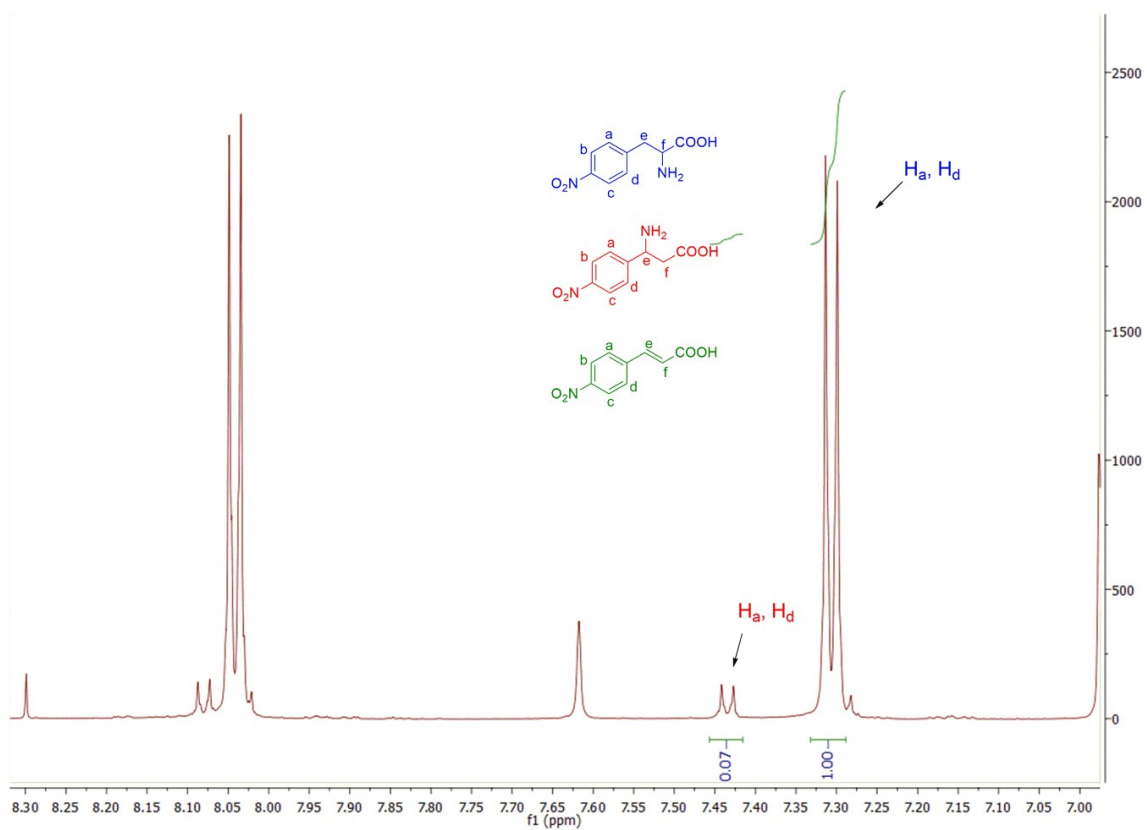

<sup>1</sup>H-NMR of the products of *PaPAM*-catalysed transformation of (±)-4-nitro- $\alpha$ -phenylalanine *rac*-**11**

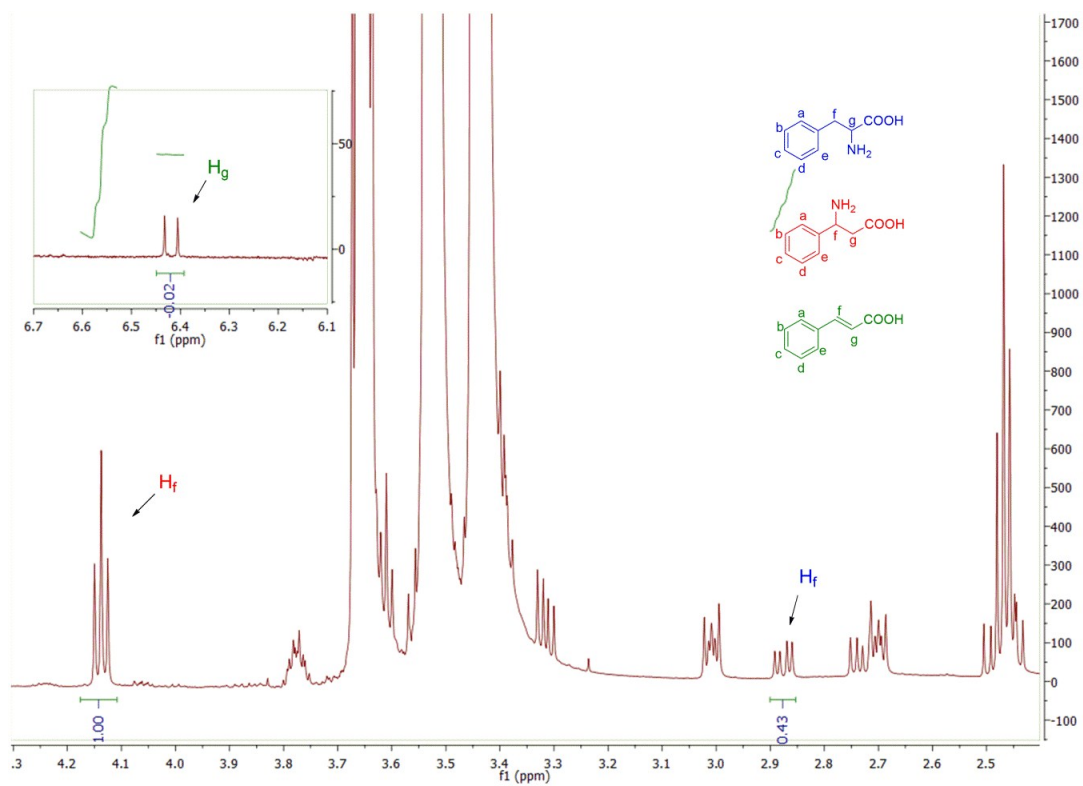

<sup>1</sup>H-NMR of the products of *PaPAM*-catalysed transformation of (±)- $\beta$ -phenylalanine *rac*-**2a**

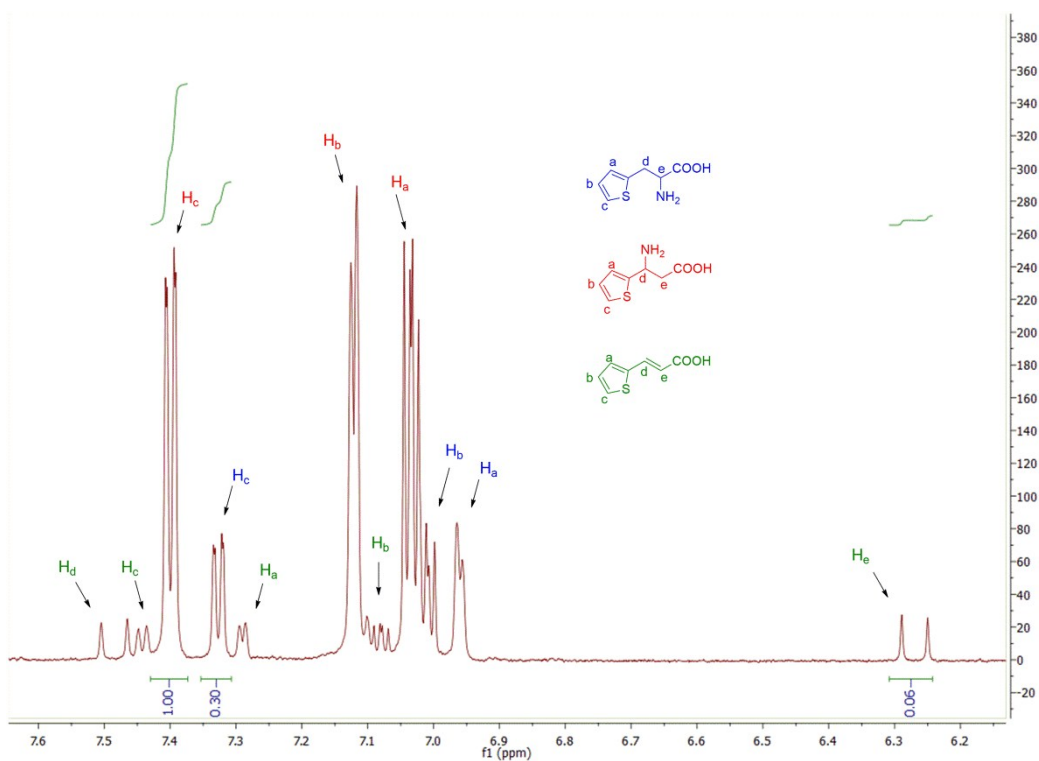

<sup>1</sup>H-NMR of the products of PaPAM-catalysed transformation of (±)-β-(thiophen-2-yl)alanine *rac*-2b

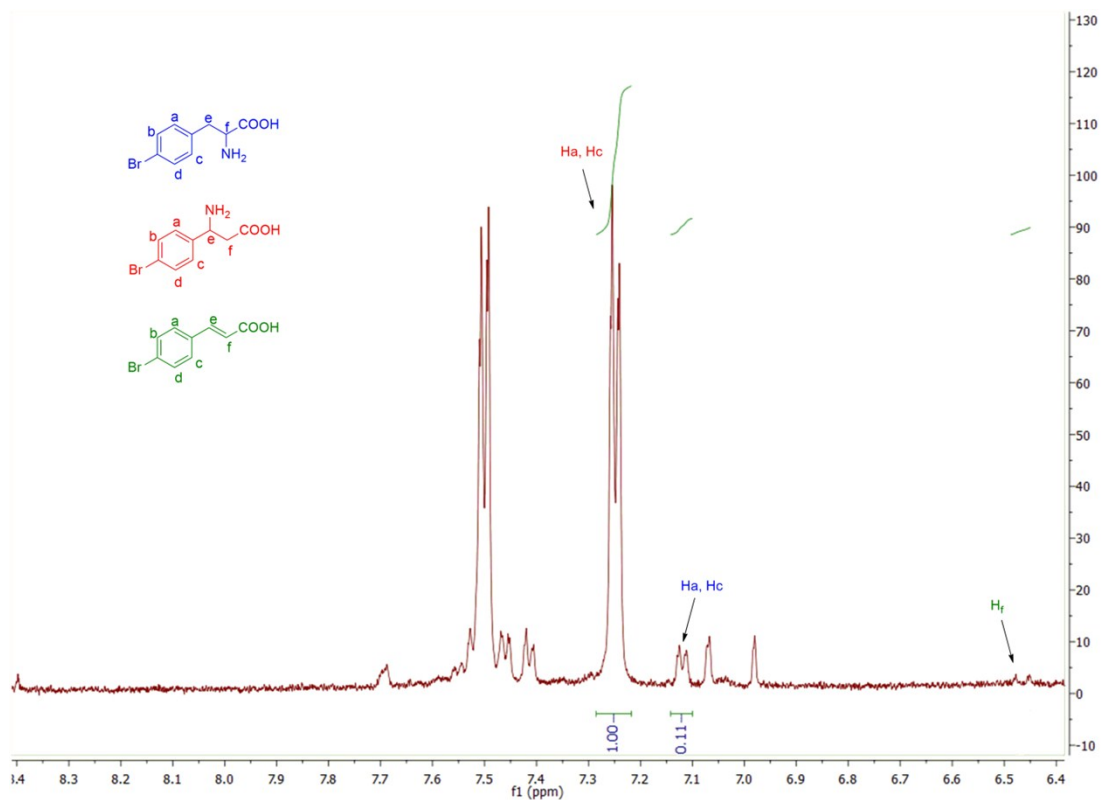

<sup>1</sup>H-NMR of the products of PaPAM-catalysed transformation of (±)-4-bromo-β-phenylalanine *rac*-2c



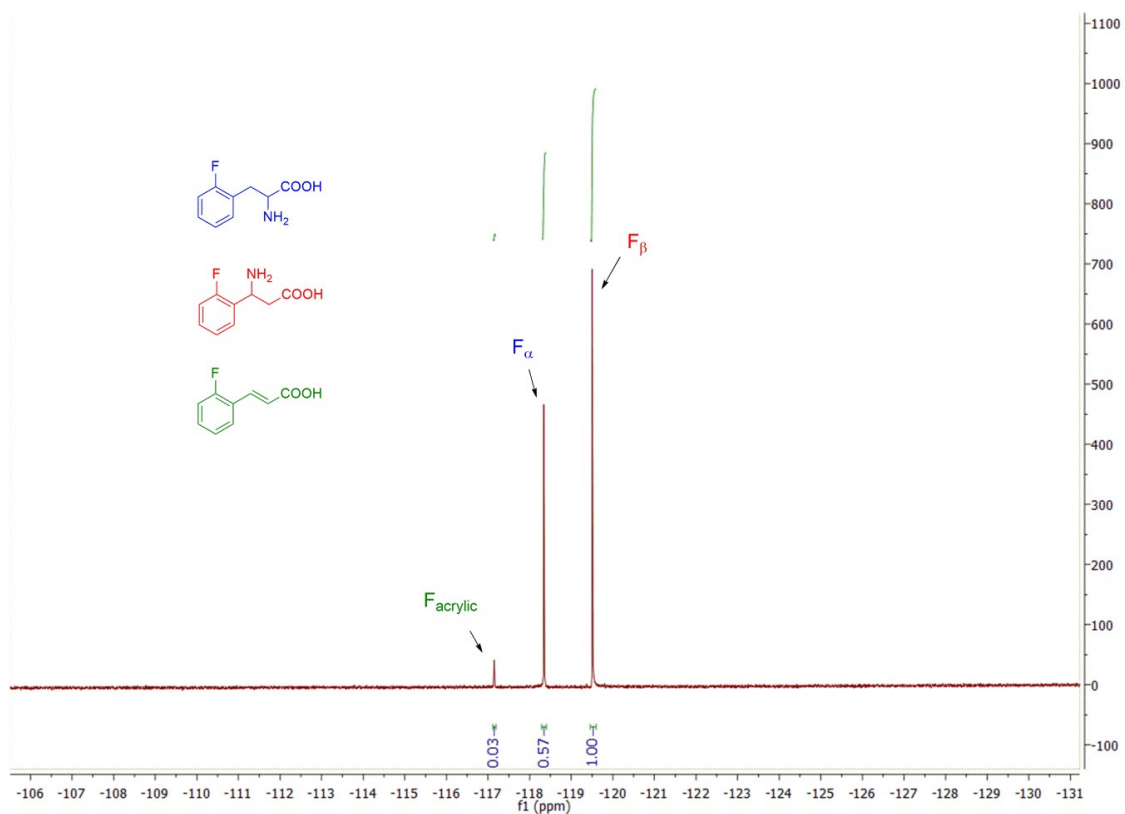

$^{19}\text{F}$ -NMR of the products of *PaPAM*-catalysed transformation of ( $\pm$ )-2-fluoro- $\beta$ -phenylalanine *rac*-**2d**

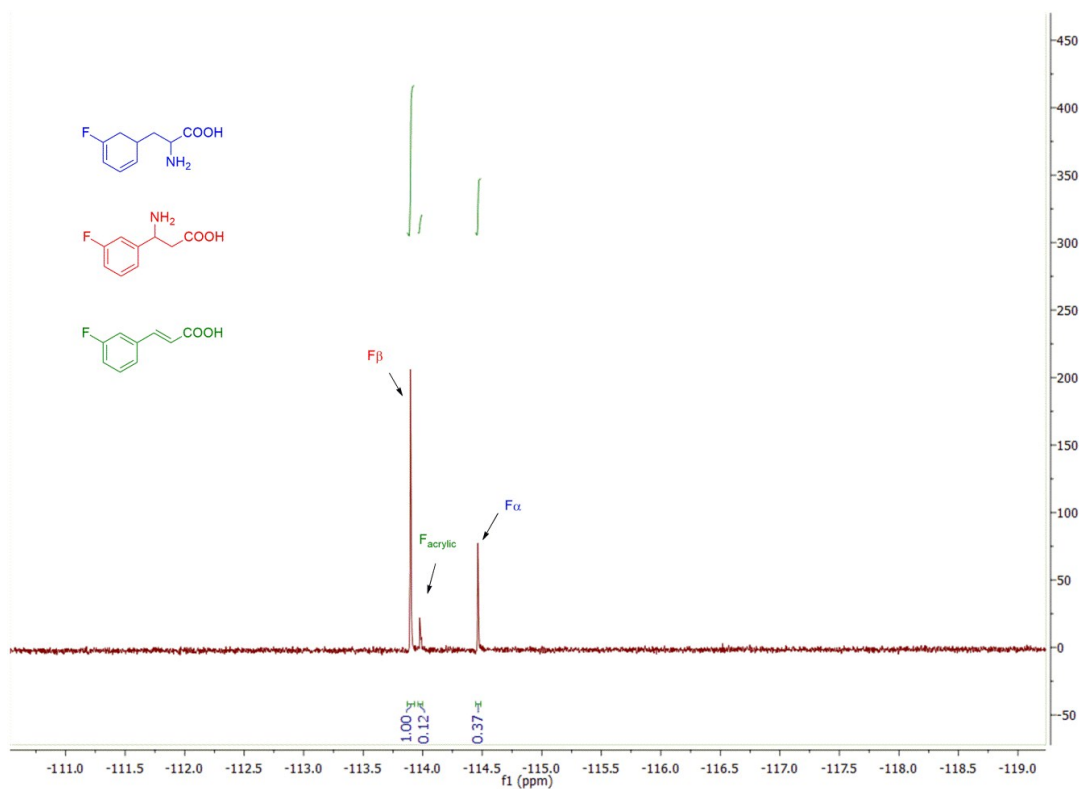

$^{19}\text{F}$ -NMR of the products of *PaPAM*-catalysed transformation of ( $\pm$ )-3-fluoro- $\beta$ -phenylalanine *rac*-**2e**

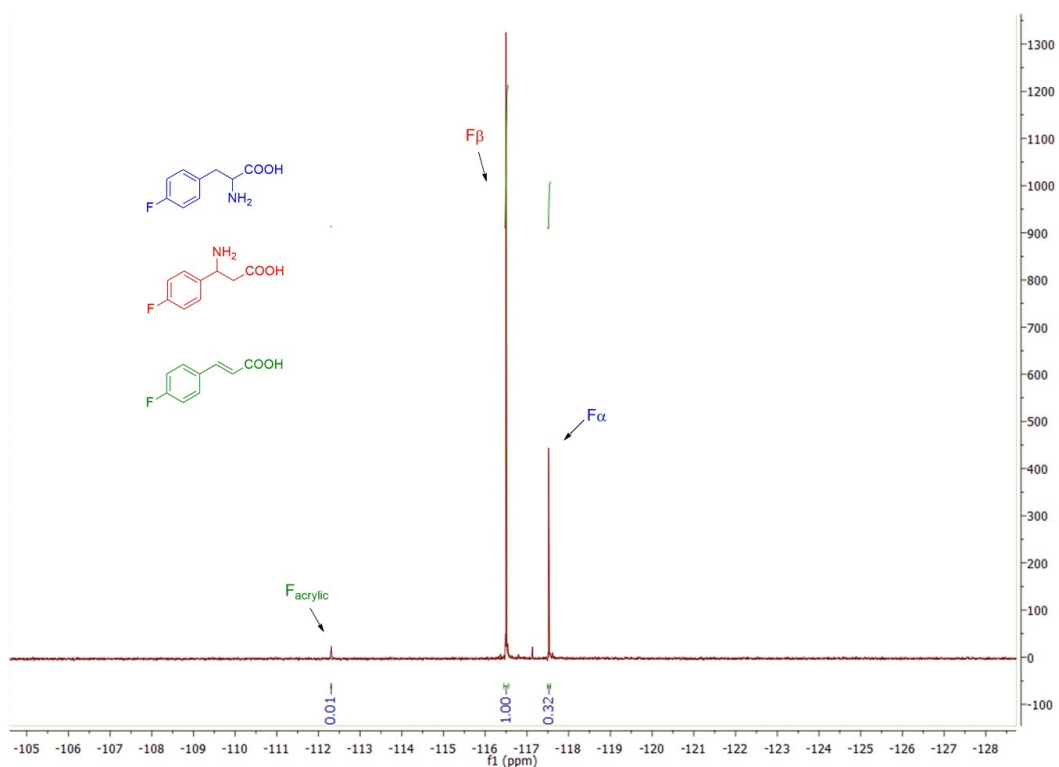

$^{19}\text{F}$ -NMR of the products of *PaPAM*-catalysed transformation of ( $\pm$ )-4-fluoro- $\beta$ -phenylalanine *rac*-**2f**

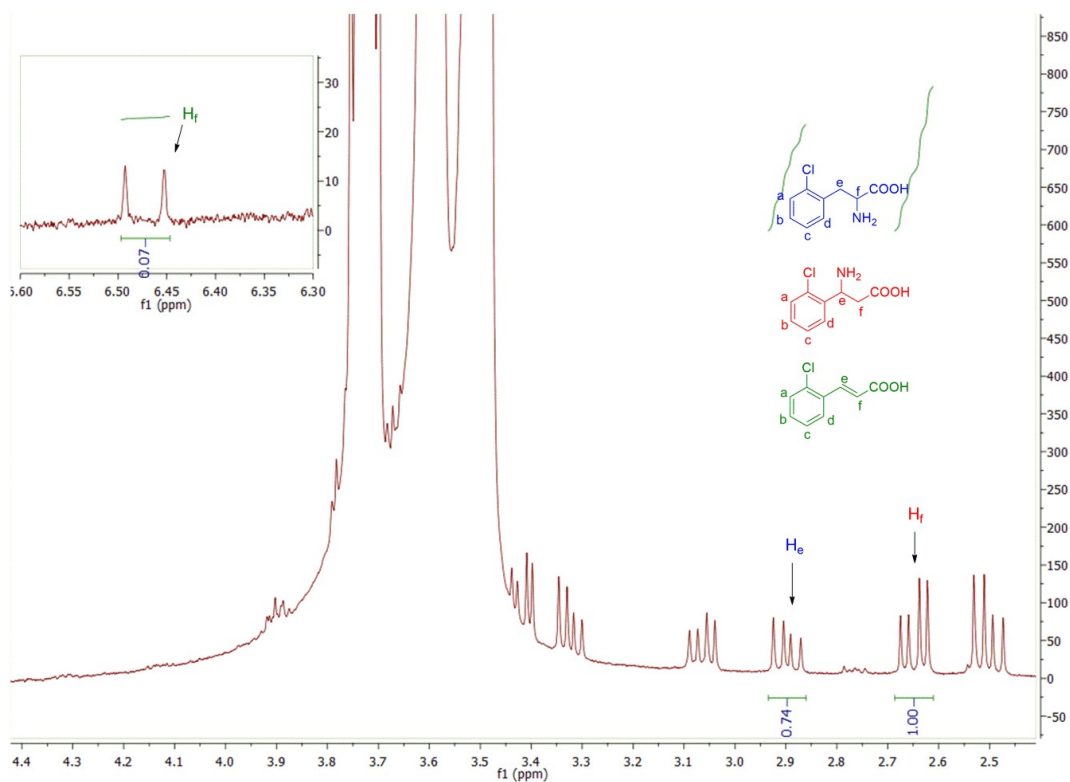

$^1\text{H}$ -NMR of *PaPAM*-catalysed transformation of ( $\pm$ )-2-chloro- $\beta$ -phenylalanine *rac*-**2g**

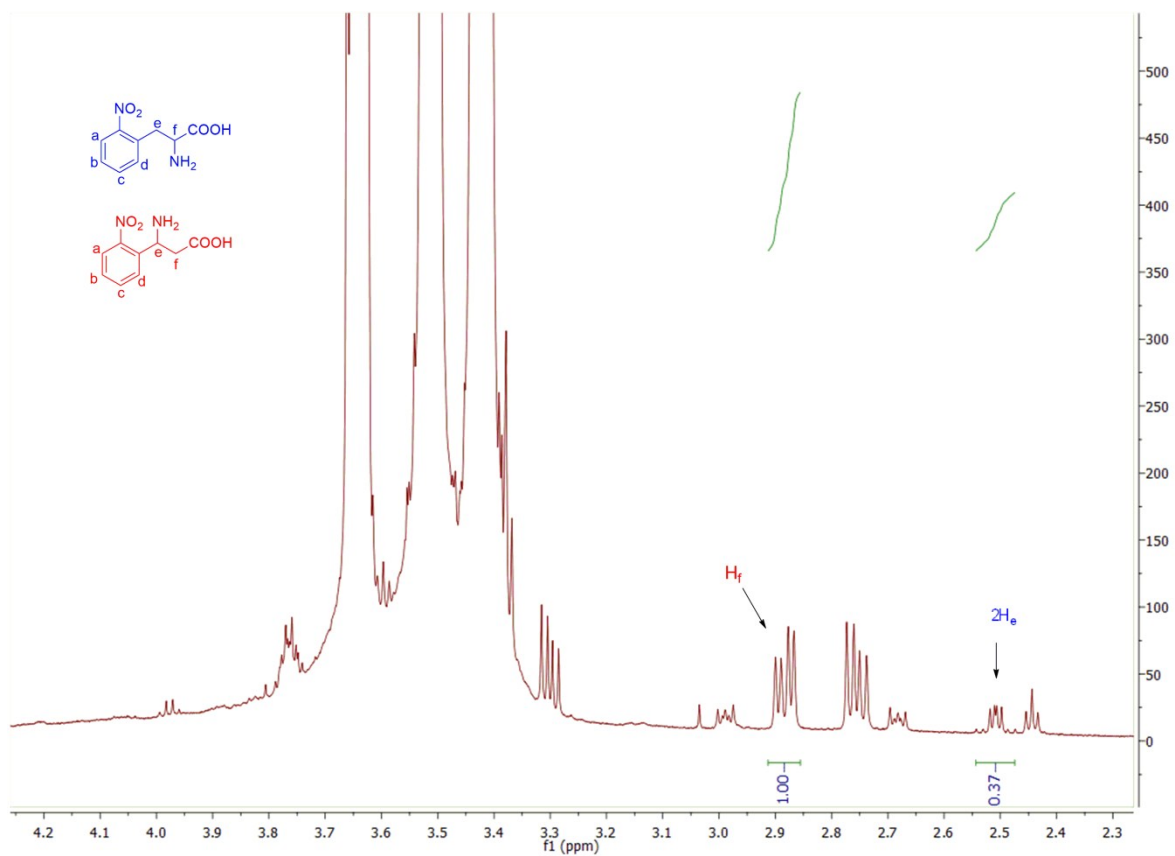

$^1\text{H-NMR}$  of PaPAM-catalysed transformation of  $(\pm)$ -2-nitro- $\beta$ -phenylalanine *rac*-**2j**

## 2. HPLC monitoring of the enzymatic reactions

### 2.1 Determination of conversion and molar fraction values

In order to determine the conversion and/or molar fractions of the products of *Pa*PAM-catalysed enzymatic transformations, the response factor of each compound was determined by mixtures of known composition of authentic racemic  $\alpha$ - and  $\beta$ -amino acids and the corresponding arylacrylate injected onto Gemini NX-C-18 column (150  $\times$  4.6 mm  $\times$  5  $\mu$ m). Mobile phase: A: NH<sub>4</sub>OH buffer (0.1 M, pH 9.0) / B: MeOH, flow rate: 0.9 mL/min, measurements performed at 20°C. Reverse phase HPLC analyses were performed on an Agilent 1100 Series system equipped with a G1379A degasser, G1311A quaternary pump, a G1329A autosampler, a G1316A temperature controlled column compartment and a G1315B diode array detector.

**Table S1.** HPLC conditions and response factors

| Aryl moiety in 1,2,3 | Eluent*<br>[% B]   | $\lambda$<br>[nm] | Response factor** |       |       |
|----------------------|--------------------|-------------------|-------------------|-------|-------|
|                      |                    |                   | 2 vs1             | 3 vs1 | 3vs2  |
| Phenyl               | 10 to 39 in 12 min | 220               | 1.988             | 0.161 | 0.084 |
| Thiophen-2-yl        | 10 to 39 in 12 min | 250               | 1.146             | 0.413 | 0.387 |
| 4-Bromophenyl        | 20 to 54 in 12min  | 220               | 1.857             | 0.372 | 0.222 |
| 2-Fluorophenyl       | 10 to 39 in 12 min | 220               | 1.249             | 0.139 | 0.119 |
| 3-Fluorophenyl       | 10 to 39 in 12min  | 220               | 3.039             | 0.156 | 0.05  |
| 4-Fluorophenyl       | 10 to 39 in 12 min | 220               | 1.388             | 0.123 | 0.095 |
| 2-Chlorophenyl       | 10 to 39 in 12 min | 220               | –                 | –     | 0.386 |
| 3-Chlorophenyl       | 15 to 50 in 15 min | 220               | 0.817             | 0.265 | –     |
| 4-Chlorophenyl       | 15 to 50 in 15 min | 220               | 0.948             | 0.679 | –     |
| 2-Nitrophenyl        | 10 to 50 in 15 min | 260               | –                 | –     | 0.019 |
| 3-Nitrophenyl        | 10 to 50 in 15 min | 260               | 2.238             | 0.144 | –     |
| 4-Nitrophenyl        | 10 to 50 in 15 min | 220               | 1.138             | 1.228 | –     |

\*Eluent A: NH<sub>4</sub>OH buffer (0.1 M, pH 9.0); B: MeOH

\*\* **1**– *rac*- $\alpha$ -arylalanine; **2**– *rac*- $\beta$ -arylalanine; **3** – arylacrylate

**Table S2.** Relative molar fractions of the products in the enzymatic reactions of *rac*- $\beta$ -arylalanines after 20 h

| Aryl moiety in<br>1,2,3 | $x_2$<br>[%] | $x_{(S)-1}$<br>[%] | $x_3$<br>[%] |
|-------------------------|--------------|--------------------|--------------|
| Phenyl                  | 73.9         | 24.3               | 1.8          |
| Thiophenyl-2-yl         | 73.1         | 24.6               | 2.3          |
| 4-Bromophenyl           | 92.8         | 6.2                | 1            |
| 2-Fluorophenyl          | 54           | 41.5               | 4.5          |
| 3-Fluorophenyl          | 74.8         | 20.3               | 4.9          |
| 4-Fluorophenyl          | 78.3         | 20                 | 1.7          |
| 2-Chlorophenyl          | 53.5         | 44.4               | 2.5          |
| 2-Nitrophenyl           | 90.8         | 9.2                | 0            |

$x_2$ ,  $x_{(S)-1}$  and  $x_3$  represent the relative molar fractions of the reaction components as determined by HPLC on Gemini NX-C-18 column

**Table S3.** Relative molar fractions of the products in the enzymatic reactions of *rac*- $\alpha$ -arylalanines after 20 h

| Aryl moiety in<br>1,2,3 | $x_2$<br>[%] | $x_{(S)-1}$<br>[%] | $x_3$<br>[%] |
|-------------------------|--------------|--------------------|--------------|
| Phenyl                  | 68.3         | 28.9               | 2.8          |
| Thiophenyl-2-yl         | 76.1         | 17.7               | 6.2          |
| 4-Bromophenyl           | 82.9         | 17.1               | 0            |
| 2-Fluorophenyl          | 88.3         | 9.3                | 2.4          |
| 3-Fluorophenyl          | 60.9         | 37.9               | 1.2          |
| 4-Fluorophenyl          | 75.5         | 23.3               | 1.2          |
| 3-Chlorophenyl          | 82.8         | 16.0               | 1.2          |
| 4-Chlorophenyl          | 83.9         | 16.1               | 0            |
| 3-Nitrophenyl           | 76.8         | 23.0               | 0.2          |
| 4-Nitrophenyl           | 94.3         | 5.7                | 0            |

$x_1$ ,  $x_{(S)-2}$  and  $x_3$  represent the relative molar fractions of the reaction components as determined by HPLC on Gemini NX-C-18 column

## 2.2 HPLC analysis of the PaPAM-catalysed reactions after 20 h

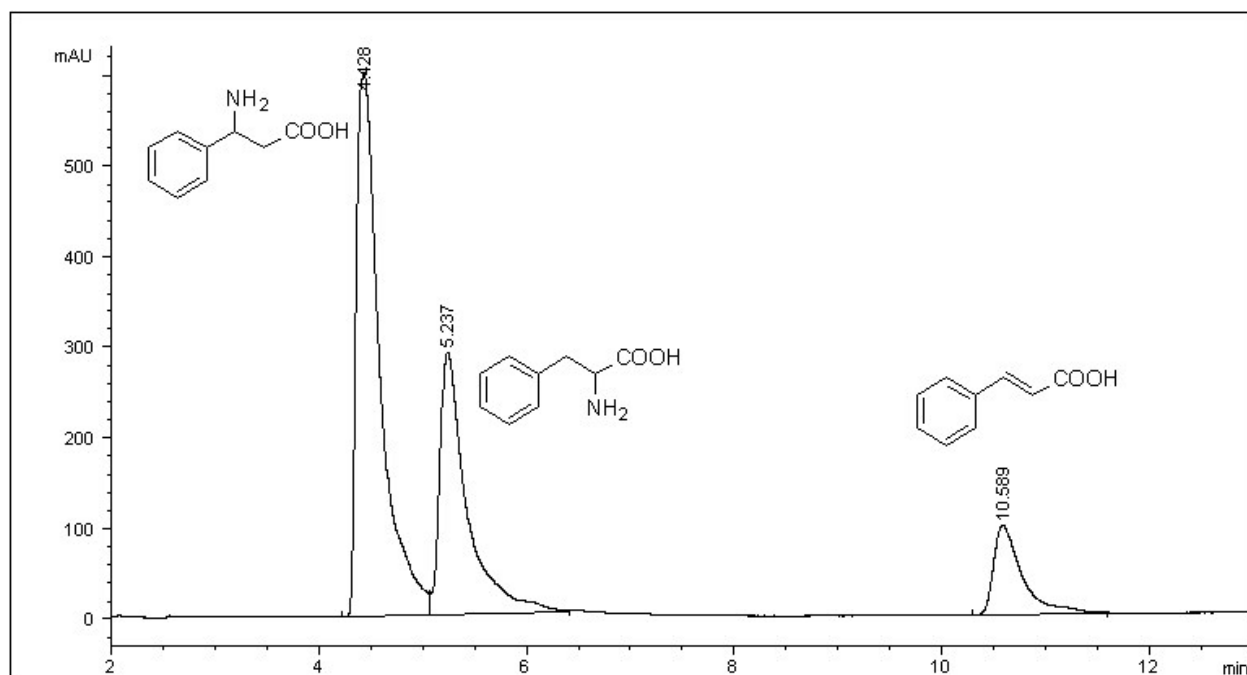

Products from (±)-β-phenylalanine (*rac-2a*) by PaPAM after 20 h.

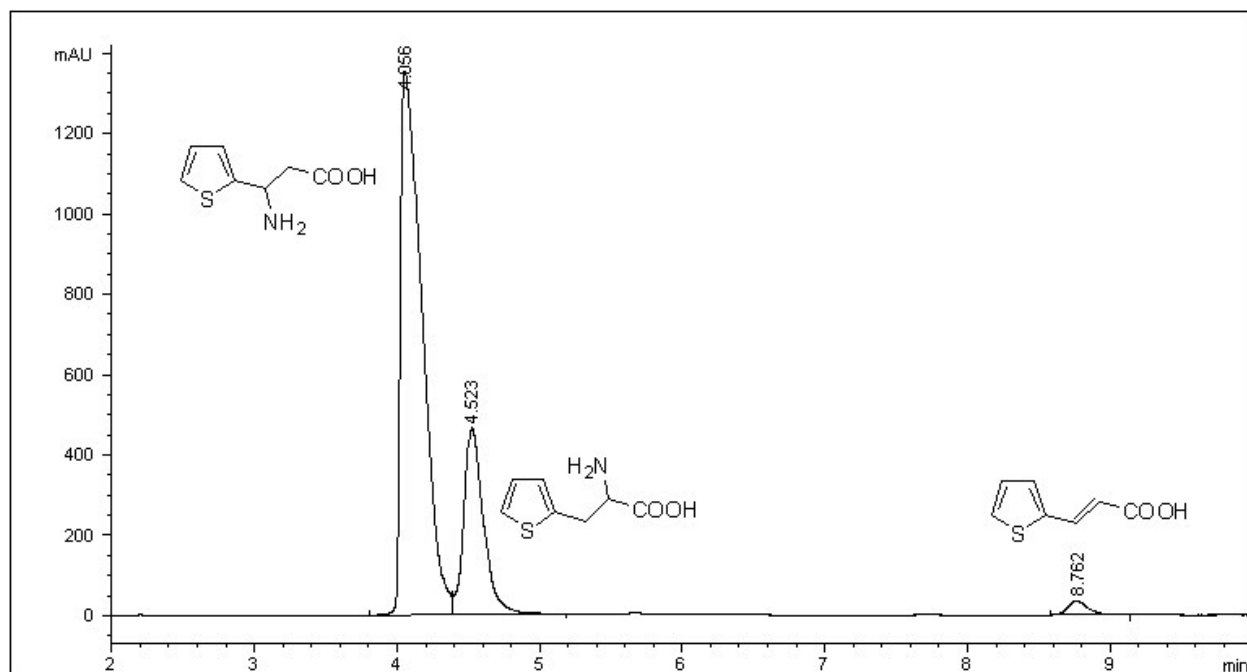

Products from (±)-β-(thiophen-2-yl)alanine (*rac-2b*) by PaPAM after 20 h.

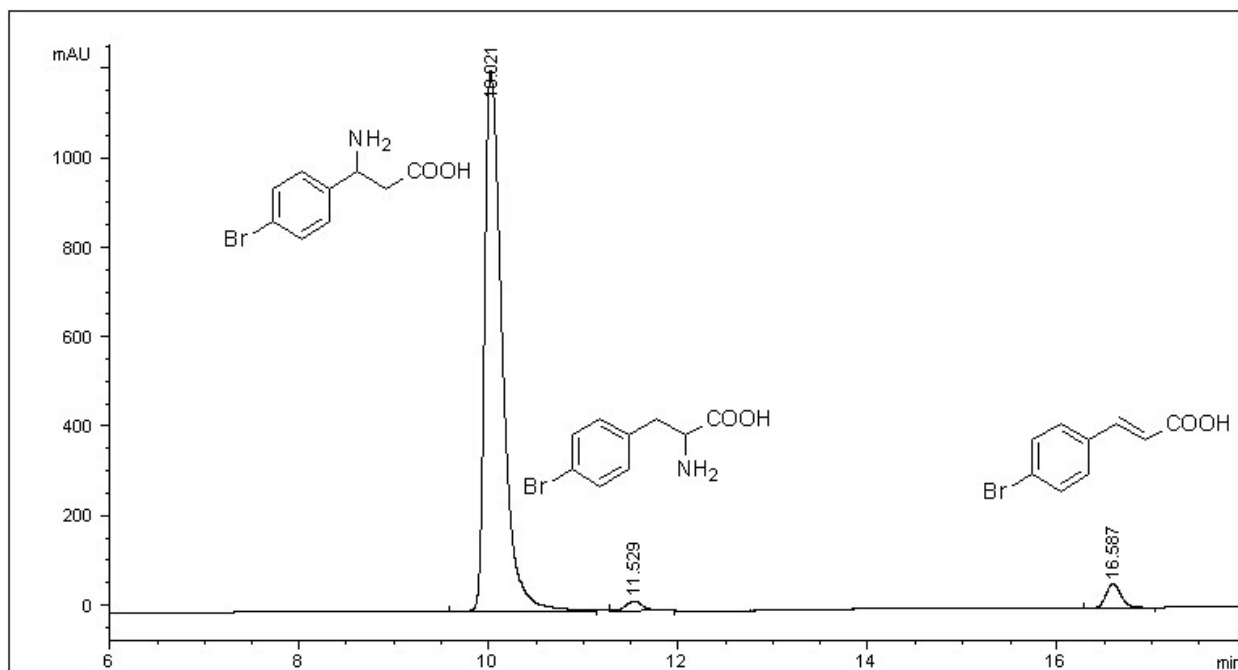

Products from (±)-4-bromo-β-phenylalanine (*rac*-**2c**) by PaPAM after 20 h.

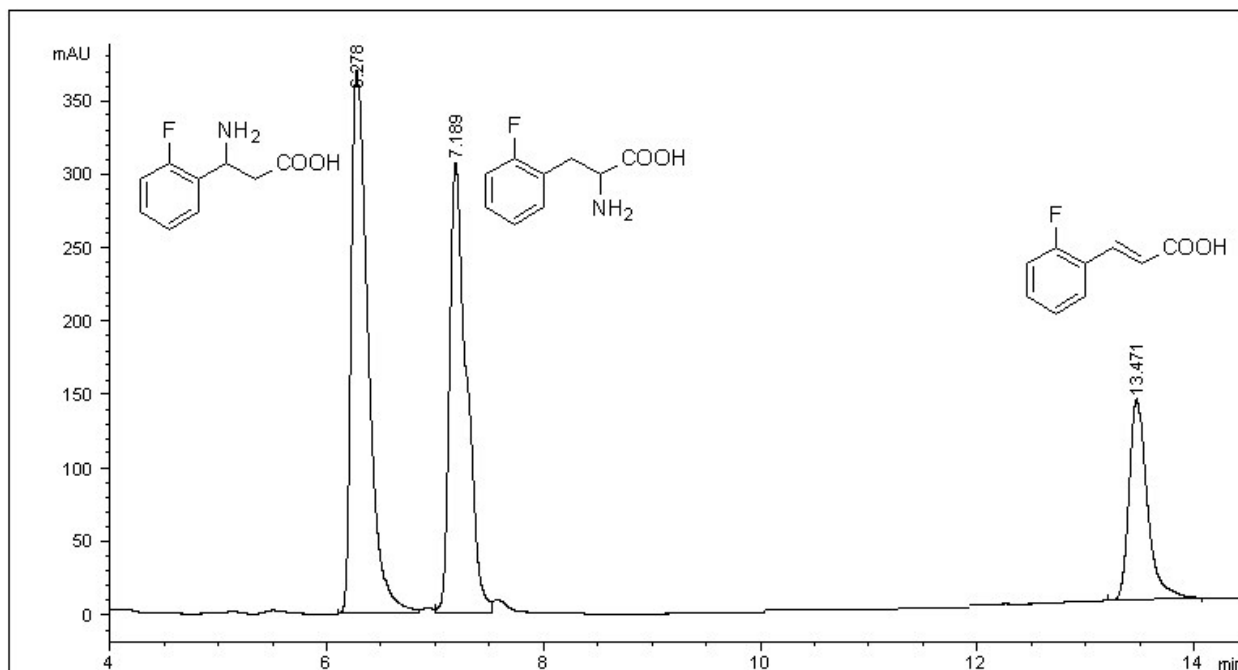

Products from (±)-2-fluoro-β-phenylalanine (*rac*-**2d**) by PaPAM after 20 h.

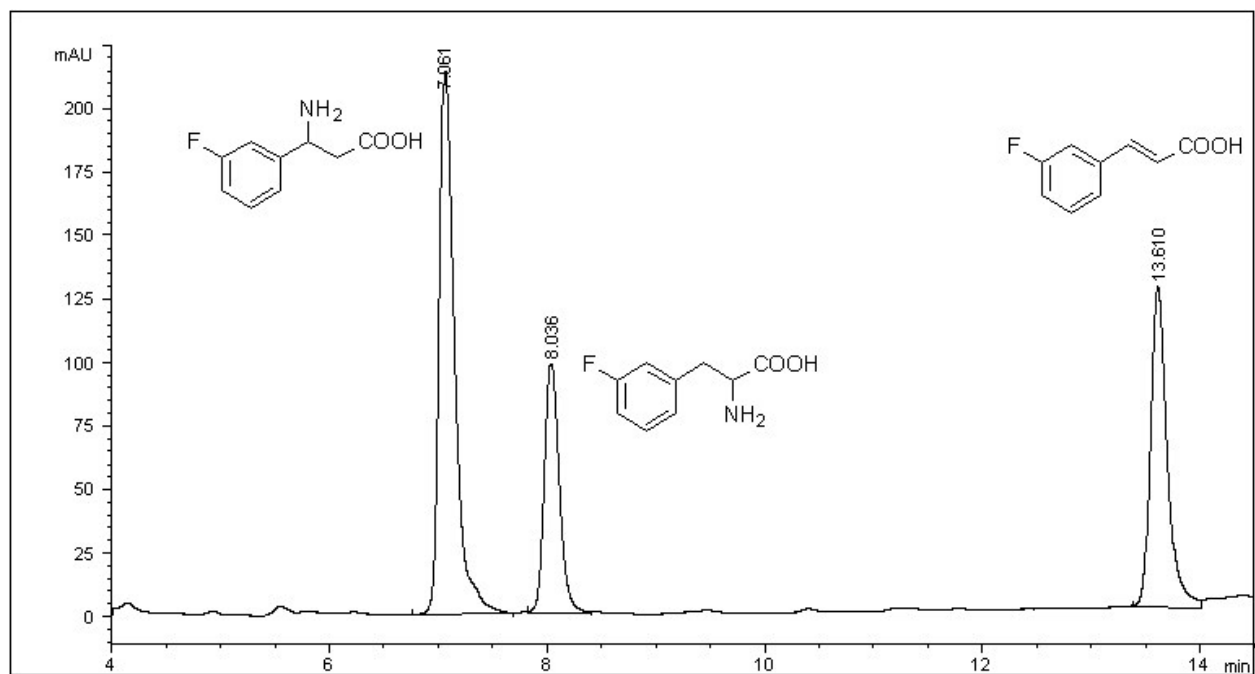

Products from (±)-3-fluoro-β-phenylalanine (*rac-2e*) by PaPAM after 20 h.

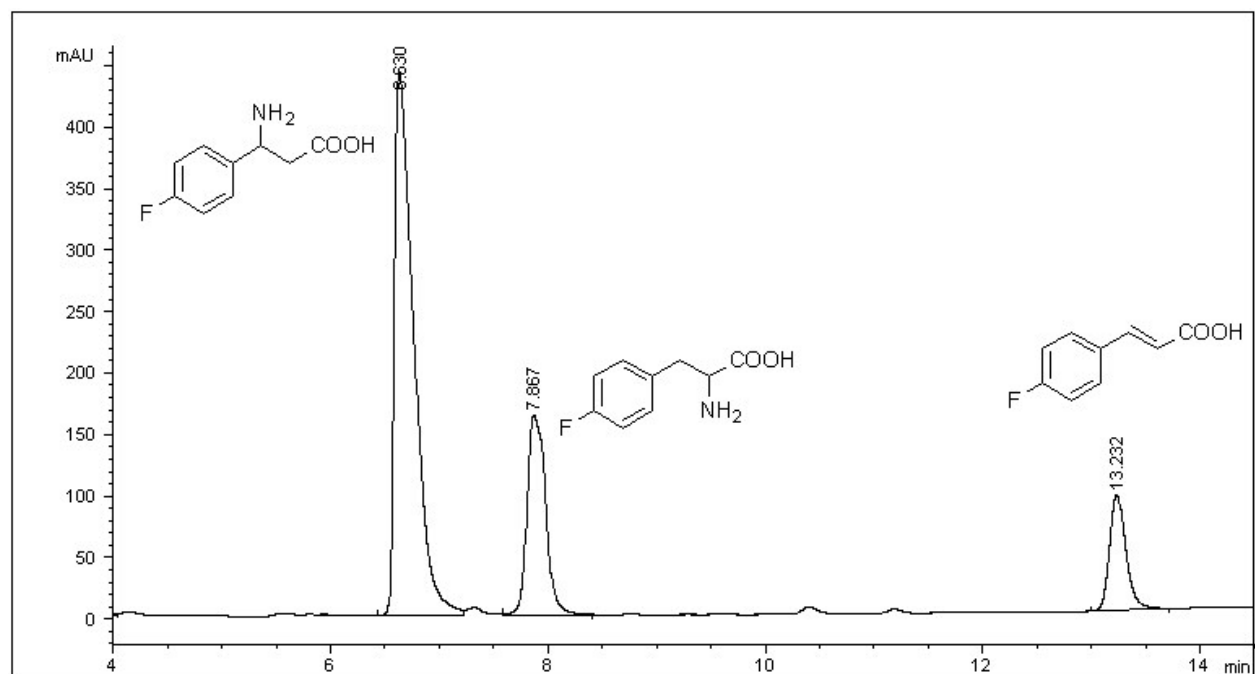

Products from (±)-4-fluoro-β-phenylalanine (*rac-2f*) by PaPAM after 20 h.



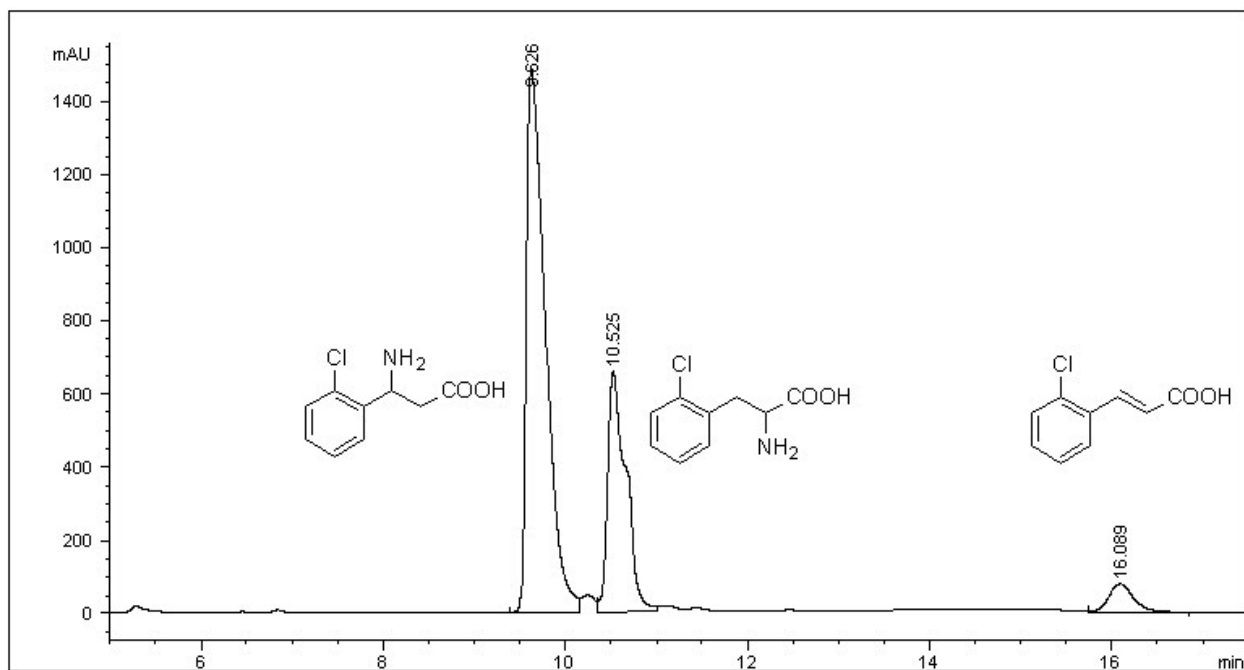

Products from (±)-2-chloro-β-phenylalanine (*rac*-**2g**) by PaPAM after 20 h.

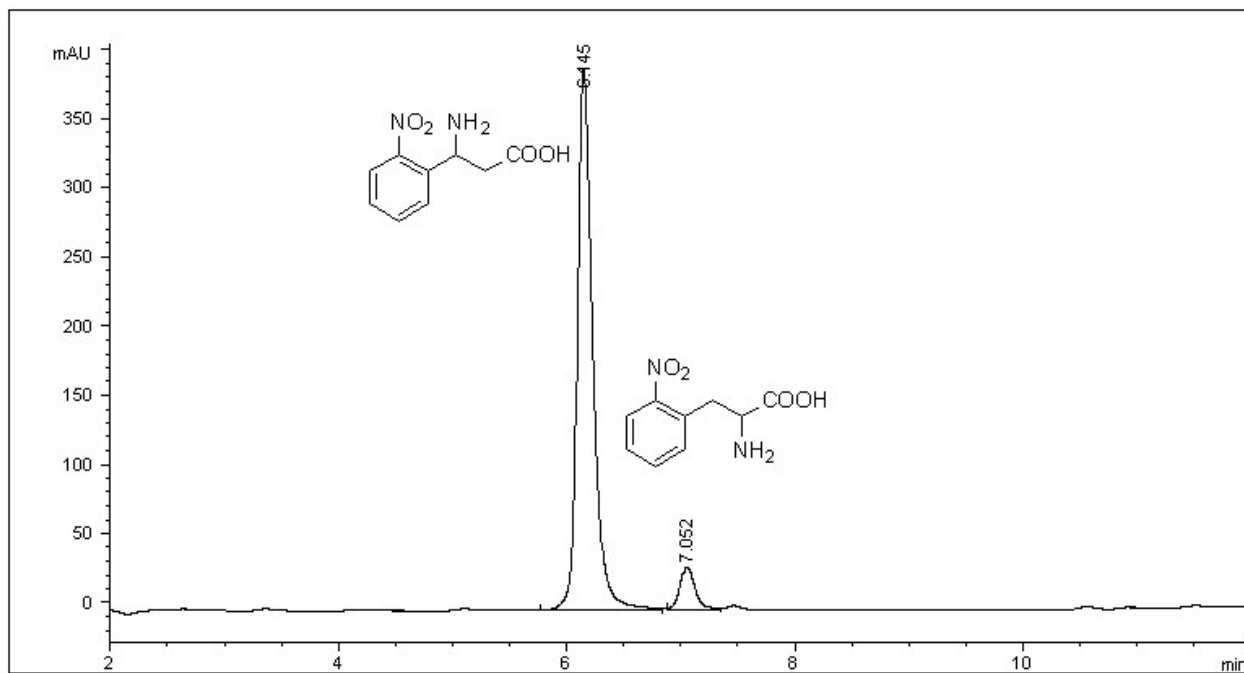

Products from (±)-2-nitro-β-phenylalanine (*rac*-**2j**) by PaPAM after 20 h.

### 3. Time-course profiles of the PaPAM-catalysed reactions

Into the solution of the substrate (*rac*-**1a-f,h,i,k,l**, *rac*-**2a-g,j**, 4 mg) in (NH<sub>4</sub>)<sub>2</sub>CO<sub>3</sub> buffer (100 mM, pH 8.0, 2 mL), PaPAM (1.6 mg) was added and the reaction mixture was stirred at room temperature. Sample preparations and HPLC measurements were performed as described in experimental section in main manuscript.

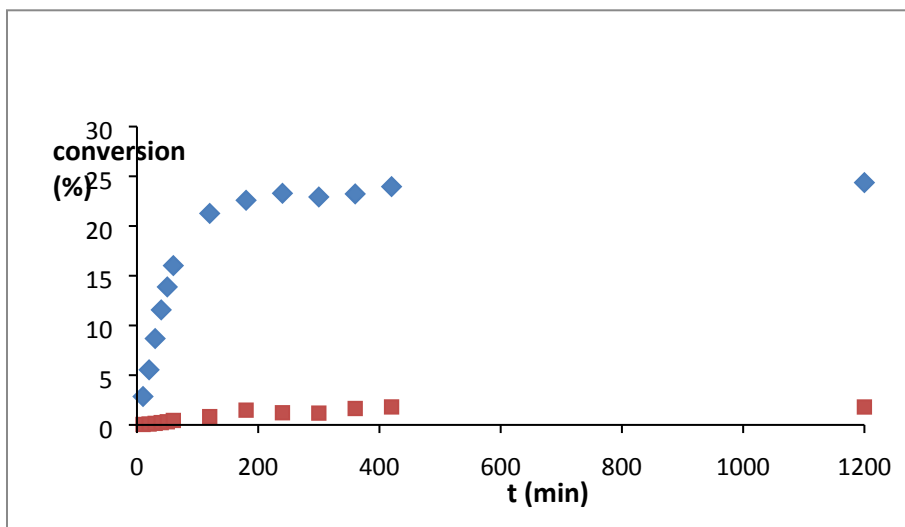

Time-course profile of the conversion of (±)-β-phenylalanine (*rac*-**2a**, ◆) to (S)-α-phenylalanine [(S)-**1a**] and (E)-cinnamic acid (**3a**, ◻)

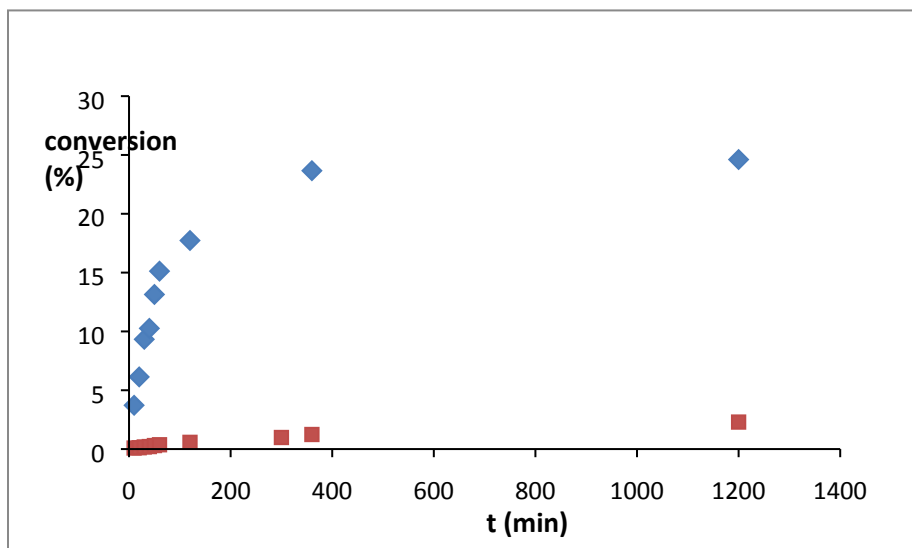

Time-course profile of the conversion of (±)-β-(thiophen-2-yl)alanine (*rac*-**2b**, ◆) to (S)-α-(thiophen-2-yl)alanine [(S)-**1b**] and (E)-3-(thiophen-2-yl)acrylic acid (**3b**, ◻)

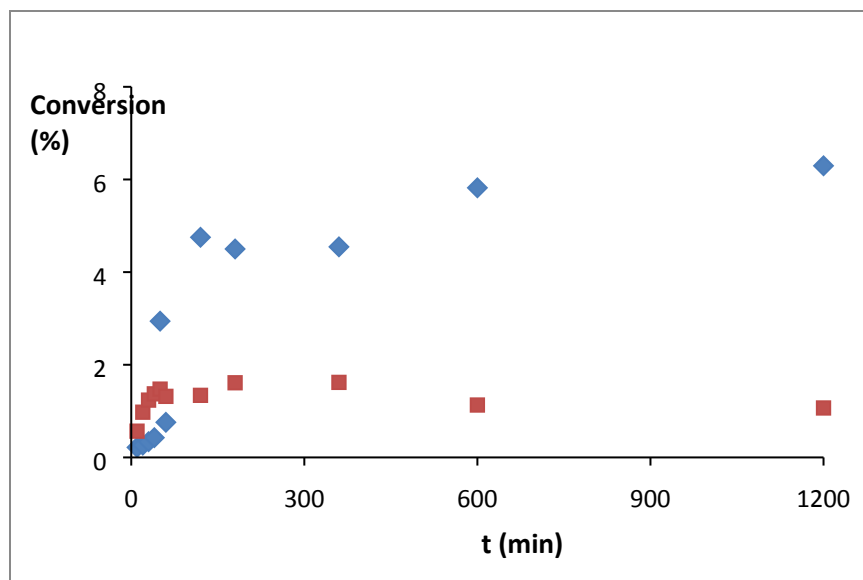

Time-course profile of the conversion of (±)-4-bromo-β-phenylalanine (*rac*-**2c**, ◆) to (*S*)-4-bromo-α-phenylalanine [(*S*)-**1c**] and (*E*)-4-bromocinnamic acid (**3c**, ☉)

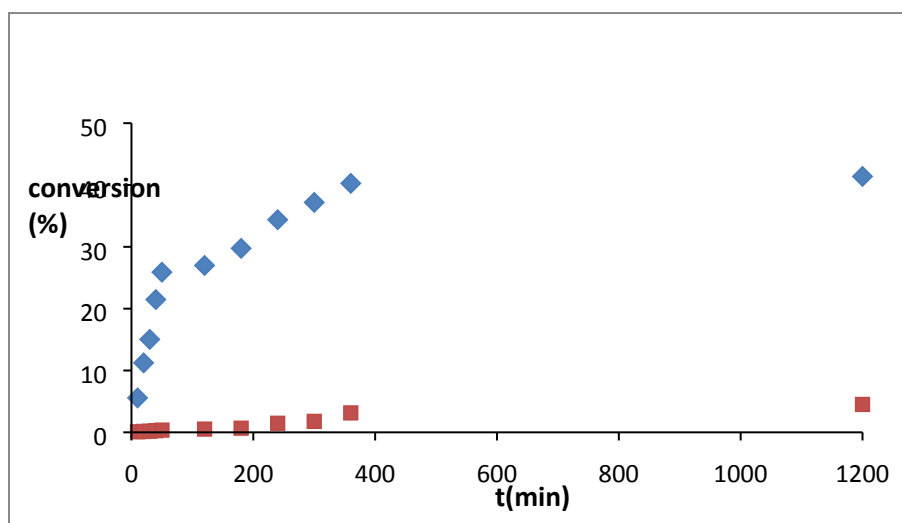

Time-course profile of the conversion of (±)-4-fluoro-β-phenylalanine (*rac*-**2d**, ◆) to (*S*)-4-fluoro-α-phenylalanine [(*S*)-**1d**] and (*E*)-4-fluorocinnamic acid (**3d**, ☉)

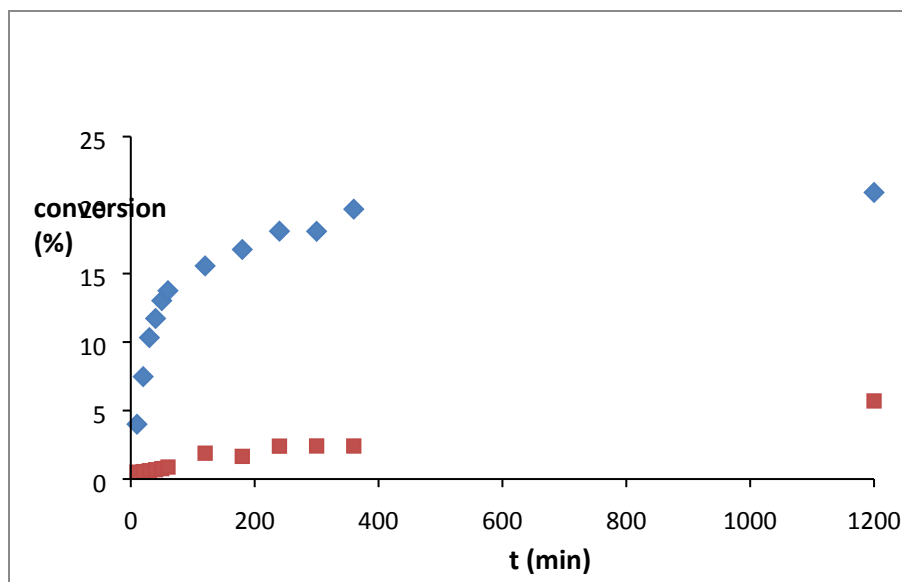

Time-course profile of the conversion of ( $\pm$ )-3-fluoro- $\beta$ -phenylalanine (*rac*-**2e**, ♦) to (*S*)-3-fluoro- $\alpha$ -phenylalanine [(*S*)-**1e**] and (*E*)-4-fluorocinnamic acid (**3e**, ☹)

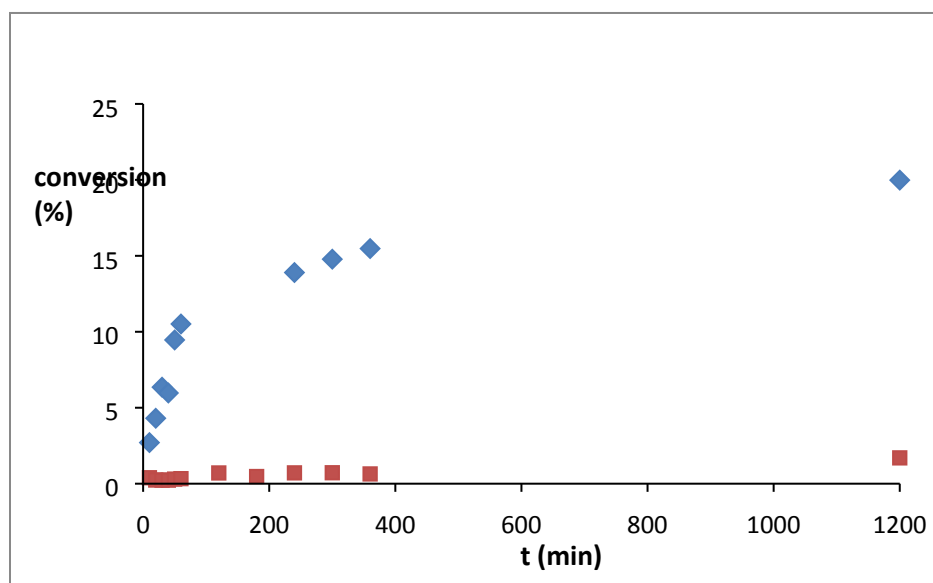

Time-course profile of the conversion of ( $\pm$ )-4-fluoro- $\beta$ -phenylalanine (*rac*-**2f**, ♦) to (*S*)-4-fluoro- $\alpha$ -phenylalanine [(*S*)-**1f**] and (*E*)-4-fluorocinnamic acid (**3f**, ☹)

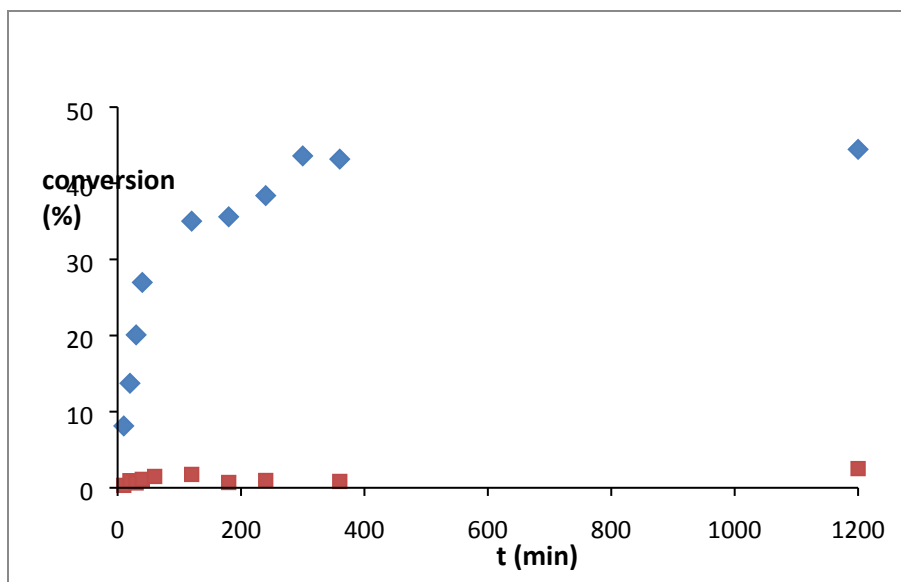

Time-course profile of the conversion of (±)-2-chloro-β-phenylalanine (*rac*-**2g**, ◆) to (*S*)-2-chloro-α-phenylalanine [(*S*)-**1g**] and (*E*)-2-chlorocinnamic acid (**3g**, ◻)

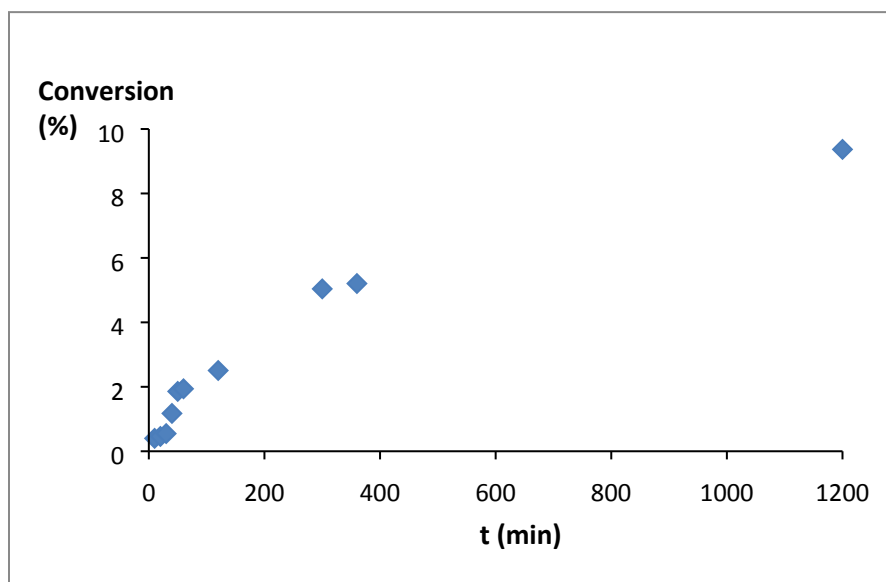

Time-course profile of the conversion of (±)-2-nitro-β-phenylalanine (*rac*-**2j**) to (*S*)-2-nitro-α-phenylalanine [(*S*)-**1j**, ◆]

#### 4. HPLC determination of the enantiomeric compositions

Samples taken from the enzymatic reactions after 20 h as described in section 2 were injected onto Crownpak<sup>®</sup> CR-I(+)-column (150 × 3.0 mm × 5 μm) using HClO<sub>4</sub> solution (pH 1.5) : acetonitrile as mobile phase, flow rate: 0.4 mL/min or onto Chiralpak<sup>®</sup> ZWIX (+) column (250 × 4.6 mm × 3 μm) using MeOH (50 mM diethylamine, 100 mM formic acid) : acetonitrile : H<sub>2</sub>O, 49:49:2 as mobile phase, flow rate: 1 mL/min.

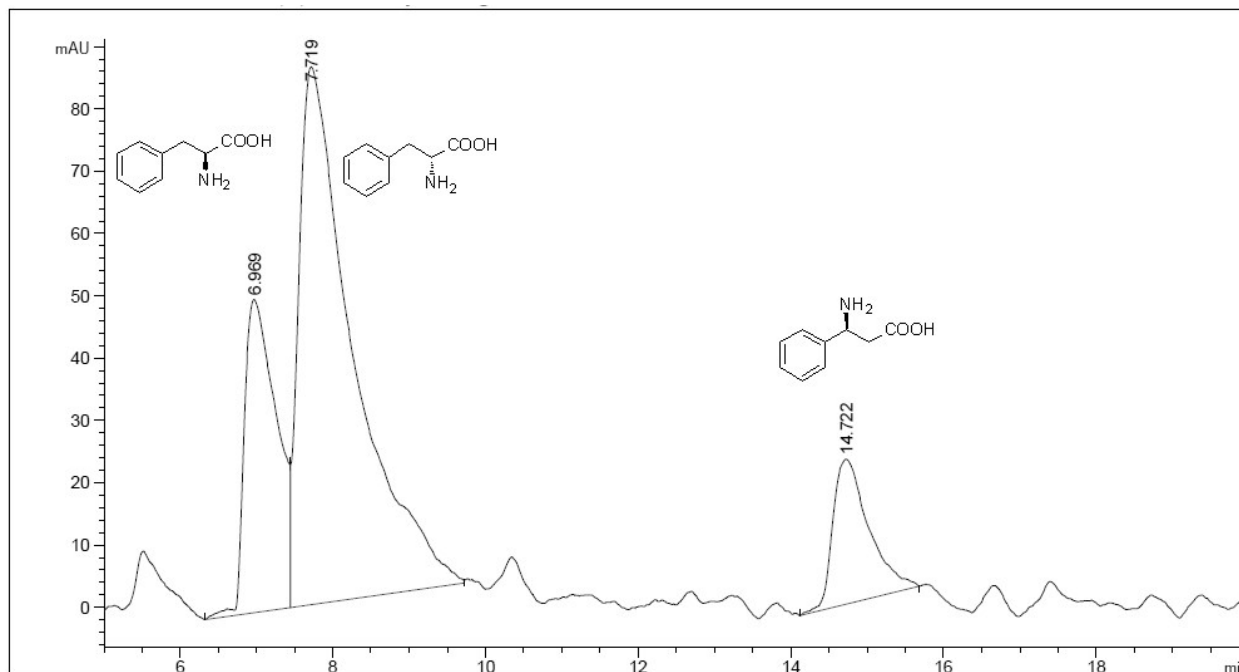

Products from (±)-α-phenylalanine (*rac-1a*) by PaPAM after 20 h [Chiralpak ZWIX (+) column]

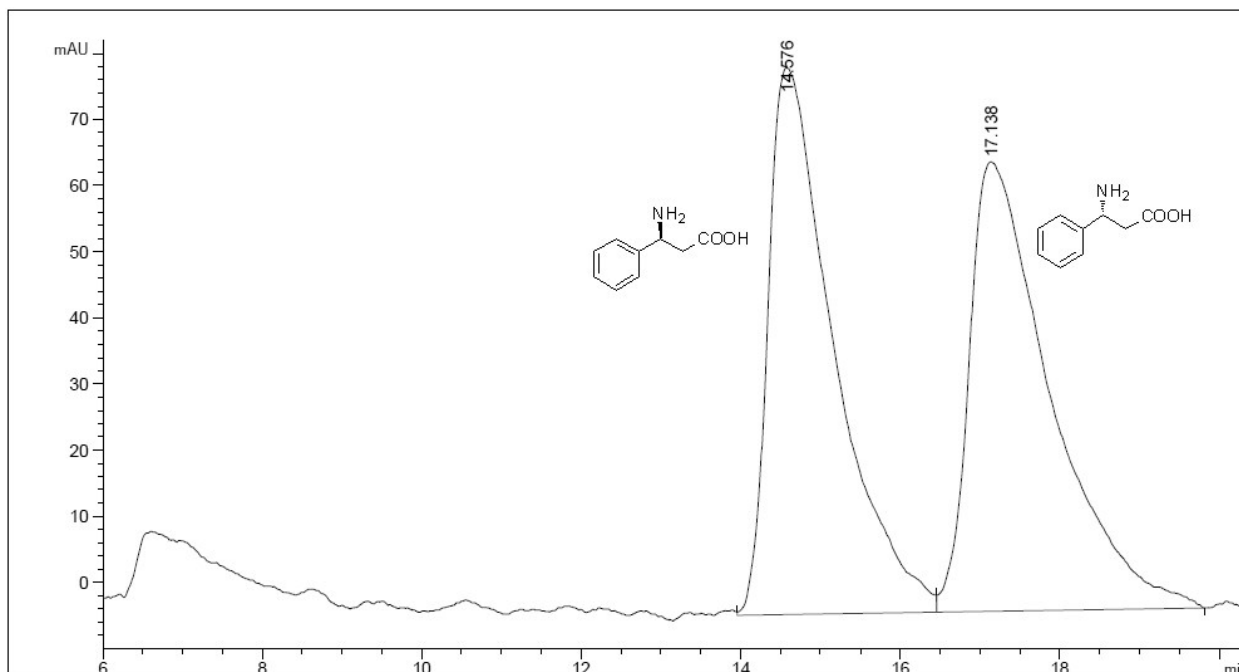

Enantioseparation of authentic (±)-β-phenylalanine (*rac-2a*) on Chiralpak ZWIX(+) column

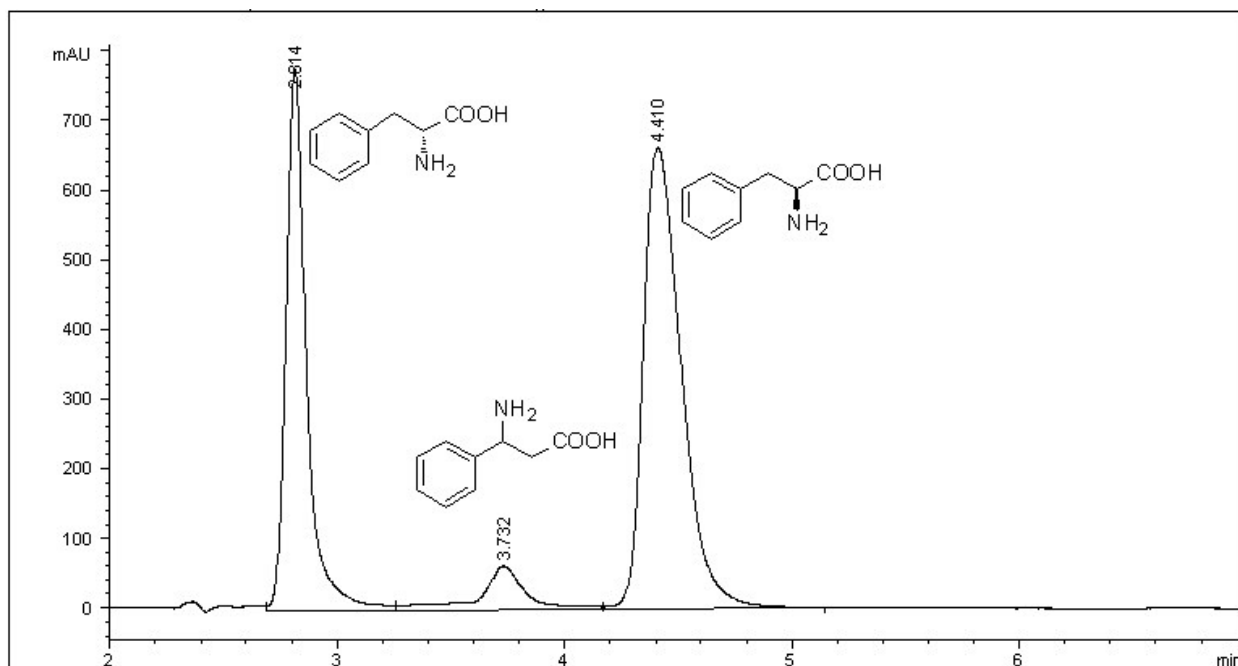

Products from  $(\pm)$ - $\alpha$ -phenylalanine (*rac*-**1a**) by PaPAM after 20 h  
[Crownpak CR-I(+)]

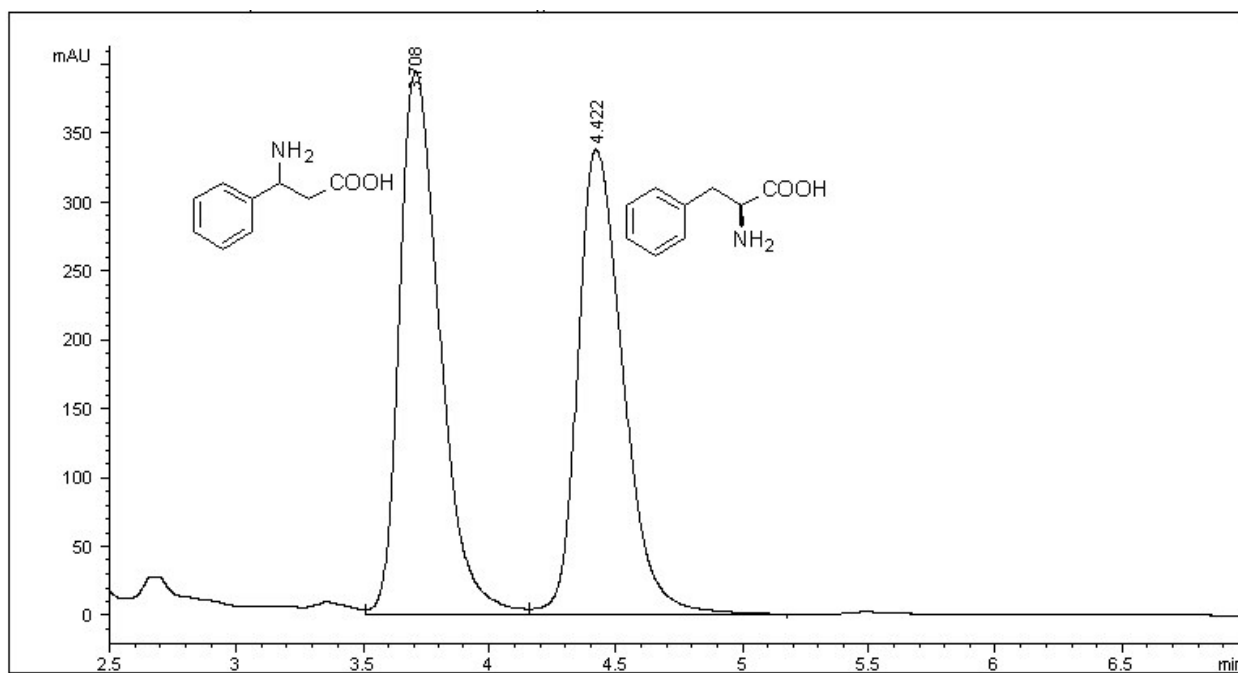

Enantioseparation of authentic  $(\pm)$ - $\beta$ -phenylalanine (*rac*-**2a**) on Crownpak CR-I(+) column

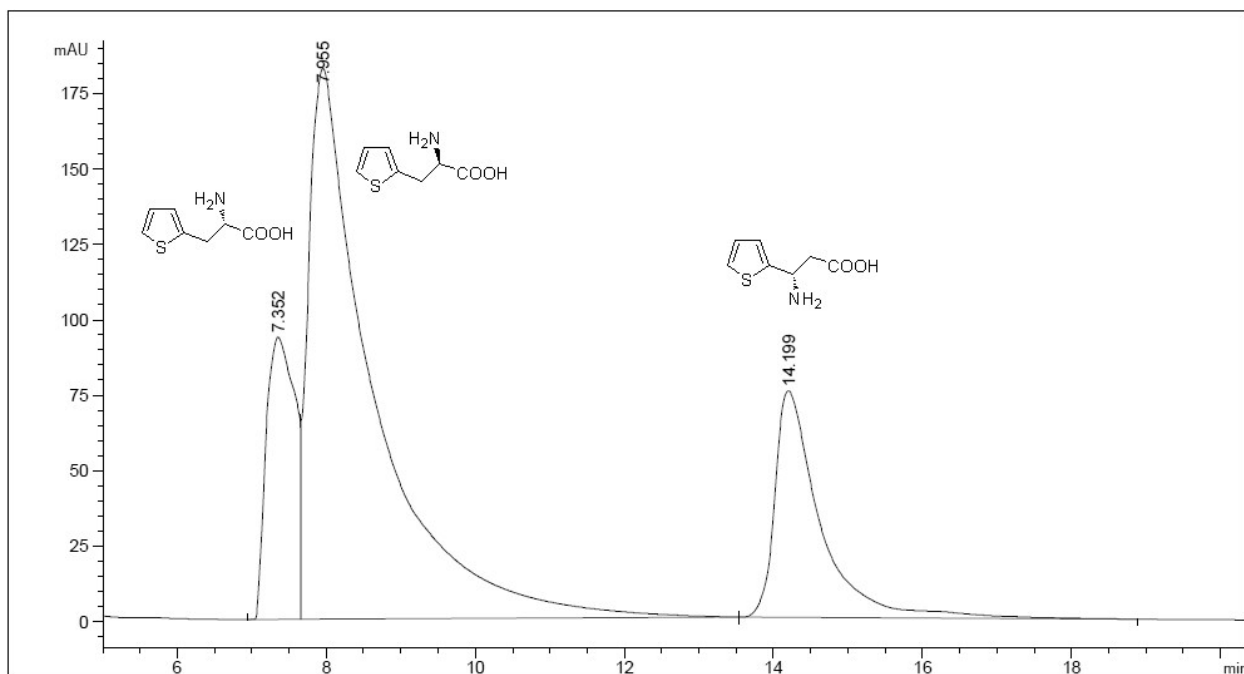

Products from  $(\pm)$ - $\alpha$ -(thiophen-2-yl)alanine (*rac-1b*) by PaPAM after 20 h  
[Chiralpak ZWIX(+) column]

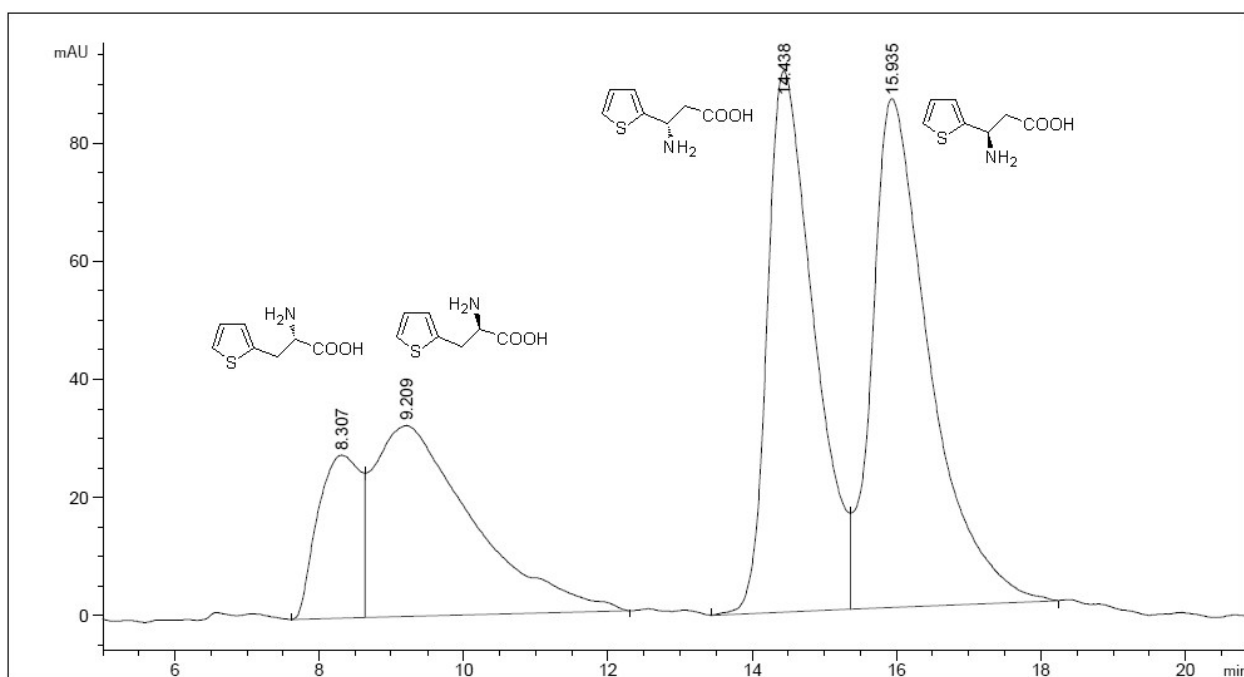

Enantioseparation of authentic  $(\pm)$ - $\beta$ -(thiophen-2-yl)alanine (*rac-2b*) and  
 $(\pm)$ - $\alpha$ -(thiophen-2-yl)alanine (*rac-1b*) on Chiralpak ZWIX(+) column



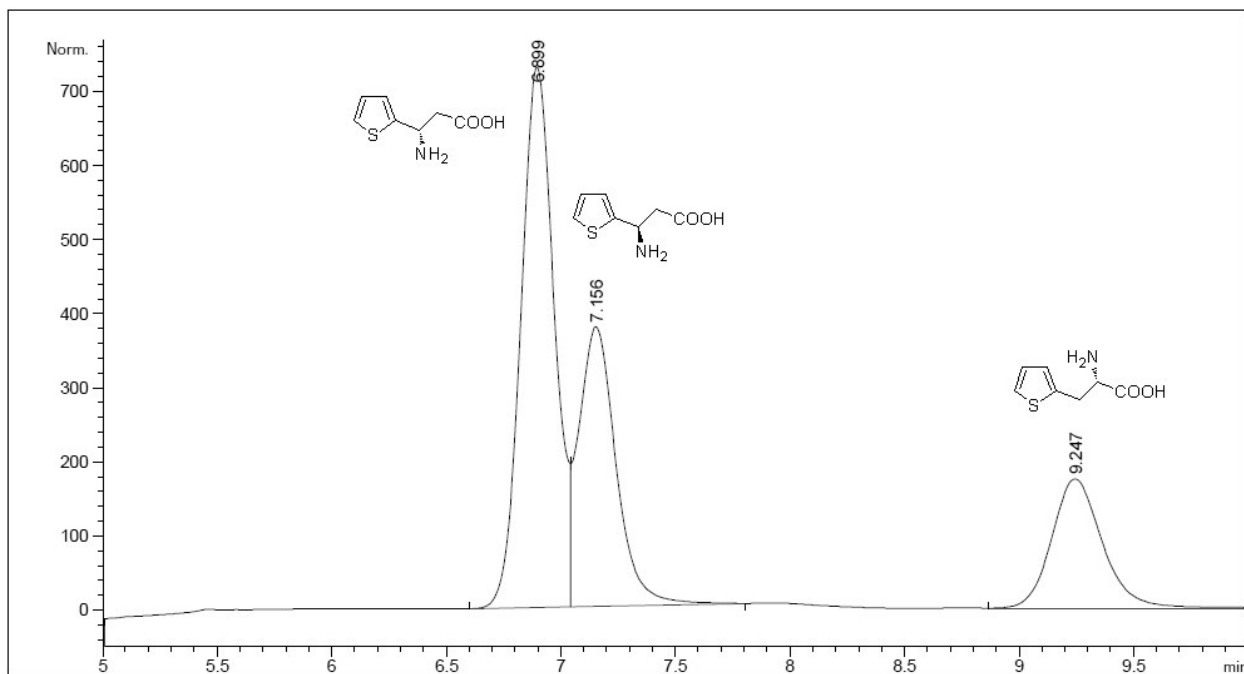

Products from  $(\pm)$ - $\beta$ -(thiophen-2-yl)alanine (*rac-2b*) by PaPAM after 20 h [Crownpak CR-I(+)column]

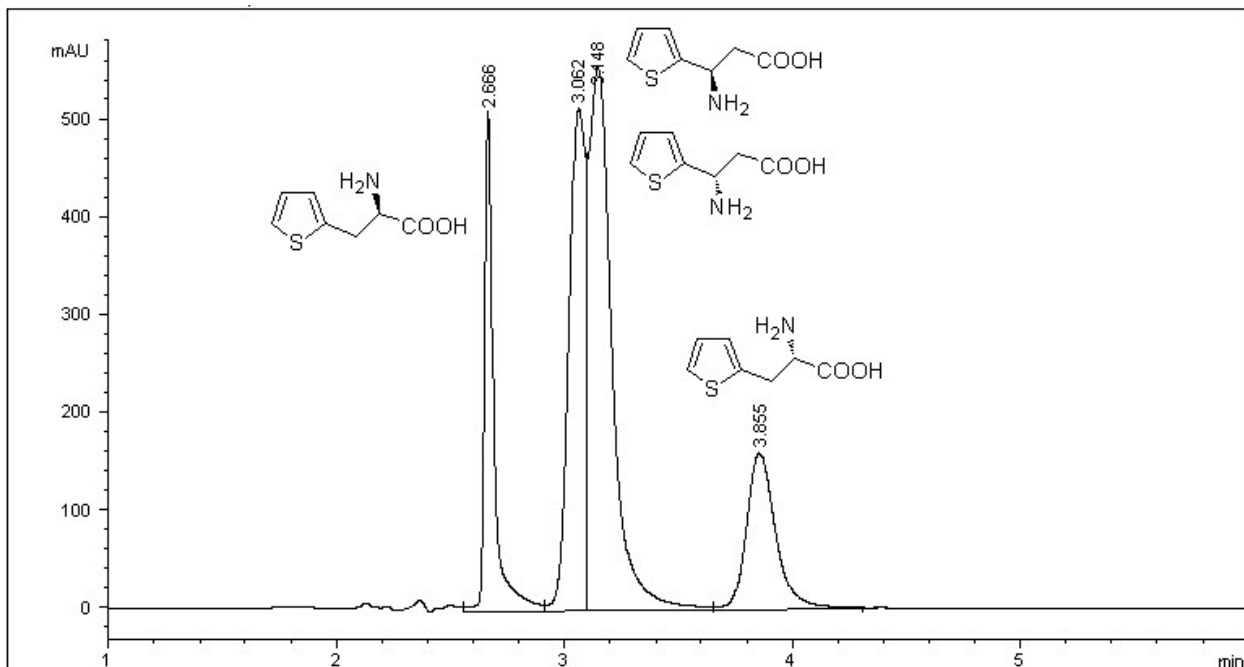

Enantioseparation of authentic  $(\pm)$ - $\beta$ -(thiophen-2-yl)alanine (*rac-2b*) and  $(\pm)$ - $\alpha$ -(thiophen-2-yl)alanine (*rac-1b*) on Crownpak CR-I(+) column

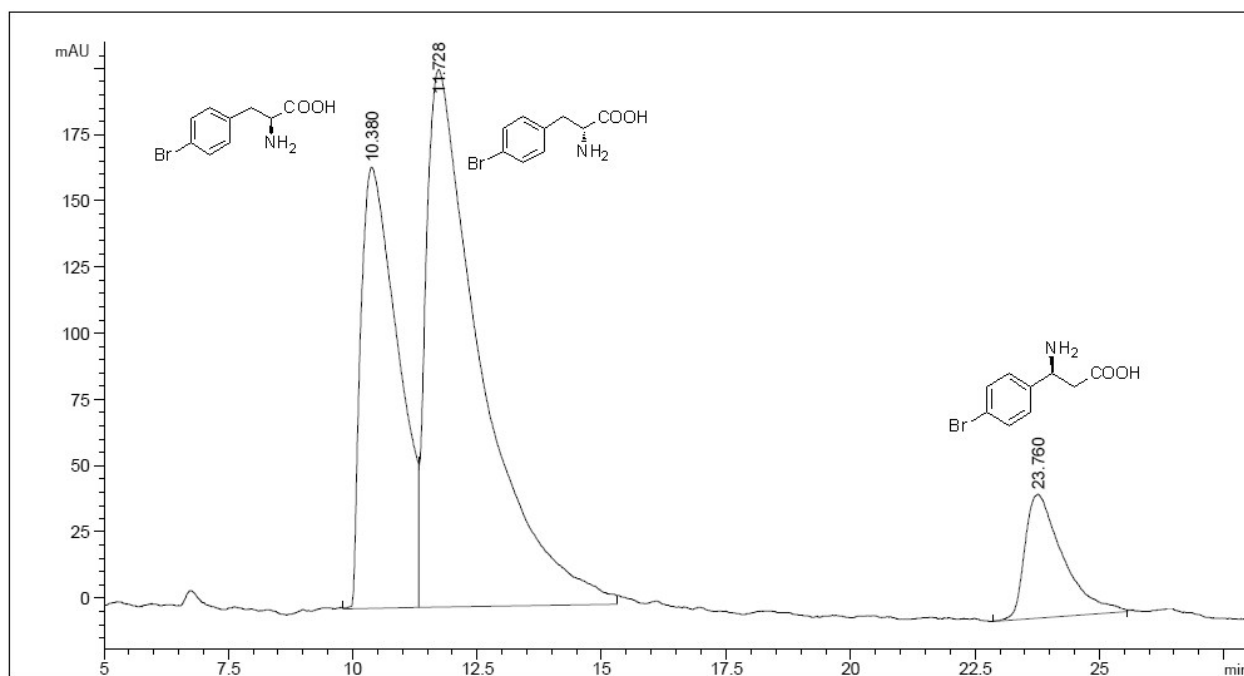

Products from  $(\pm)$ -4-bromo- $\alpha$ -phenylalanine (*rac*-1c) by PaPAM after 20 h  
[Chiralpak ZWIX(+) column]

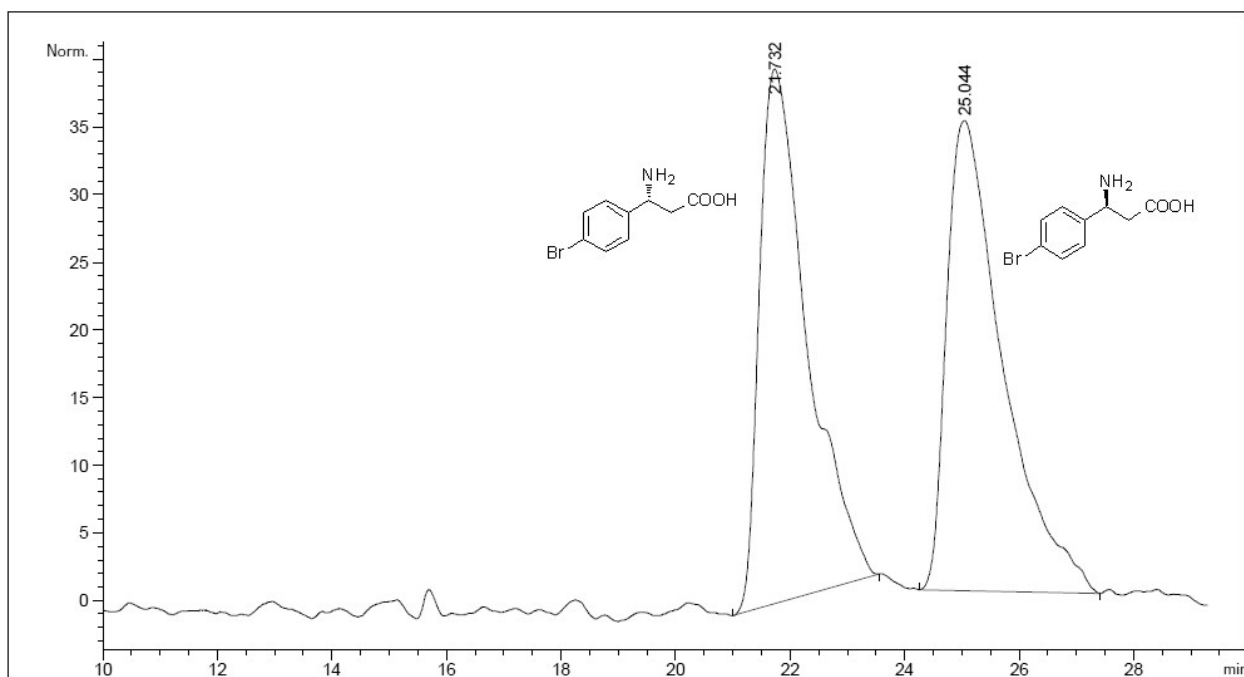

Enantioseparation of authentic  $(\pm)$ -4-bromo- $\alpha$ -phenylalanine (*rac*-1c)  
on Chiralpak ZWIX(+) column

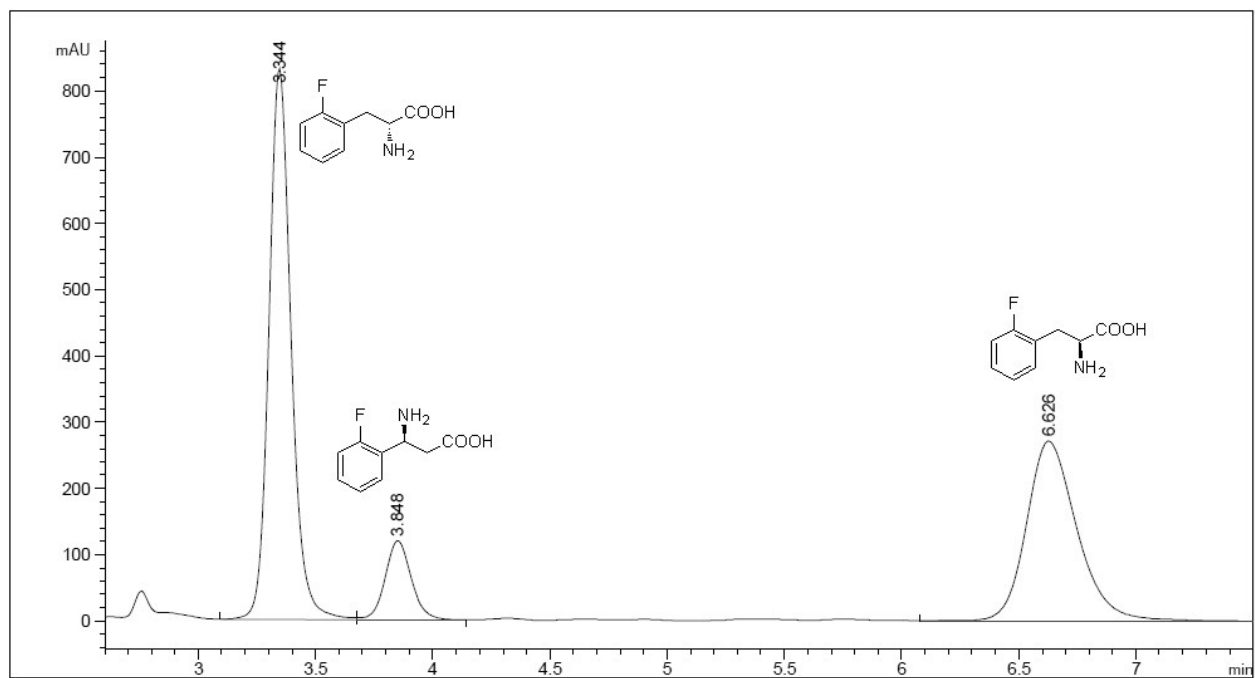

Products from (±)-4-fluoro- $\alpha$ -phenylalanine (*rac*-**1d**) by PaPAM after 20 h  
[Crownpak CR-I(+)column]

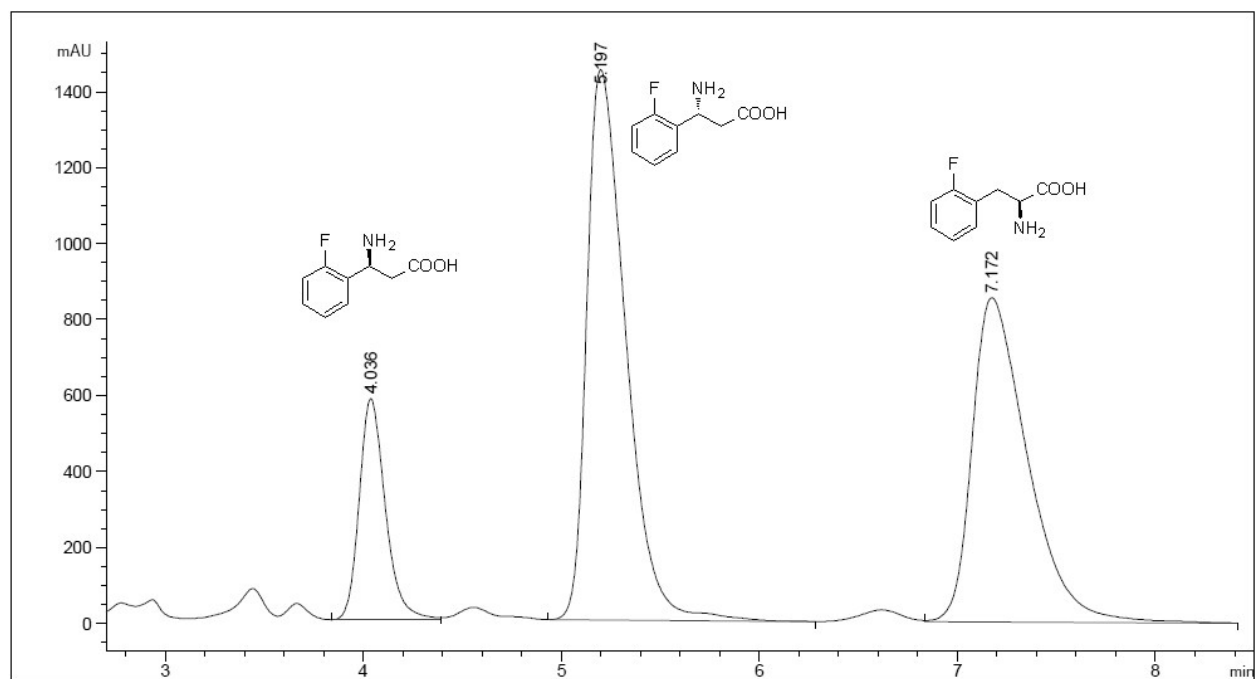

Products from (±)-4-fluoro- $\beta$ -phenylalanine (*rac*-**2d**) by PaPAM after 20 h  
[Crownpak CR-I(+)column]

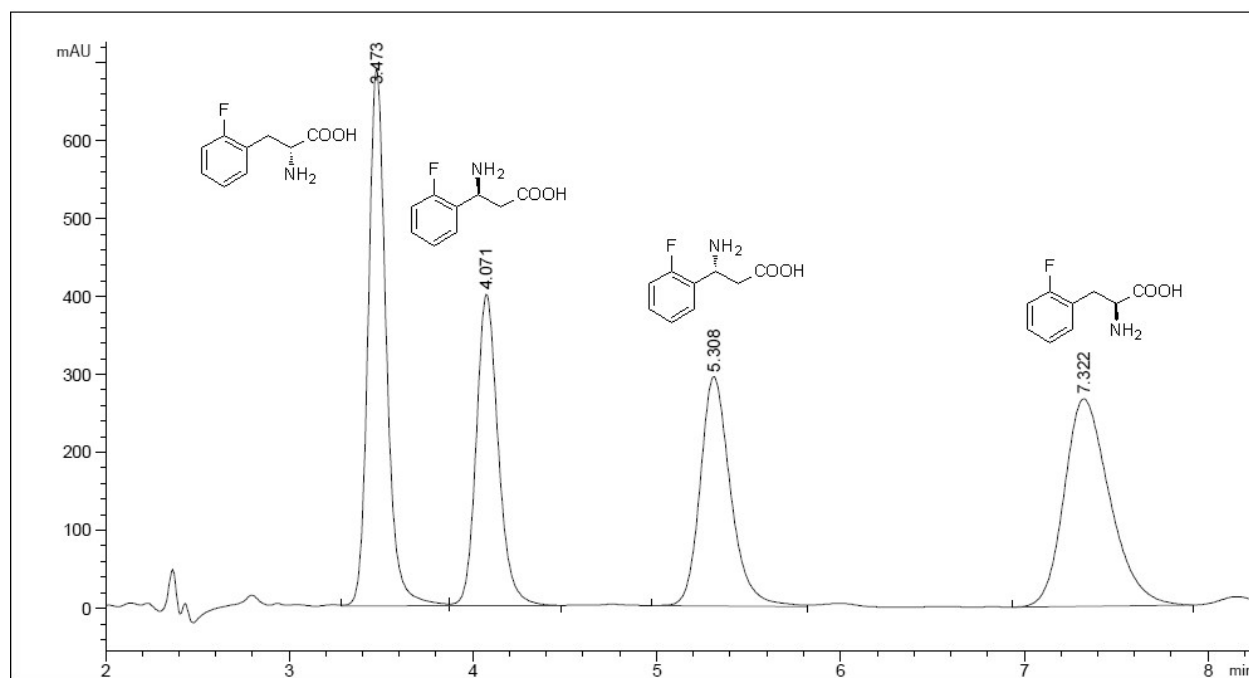

Enantioseparation of authentic (±)-4-fluoro- $\alpha$ -phenylalanine and (±)-4-fluoro- $\beta$ -phenylalanine on Crownpak CR-I(+)column

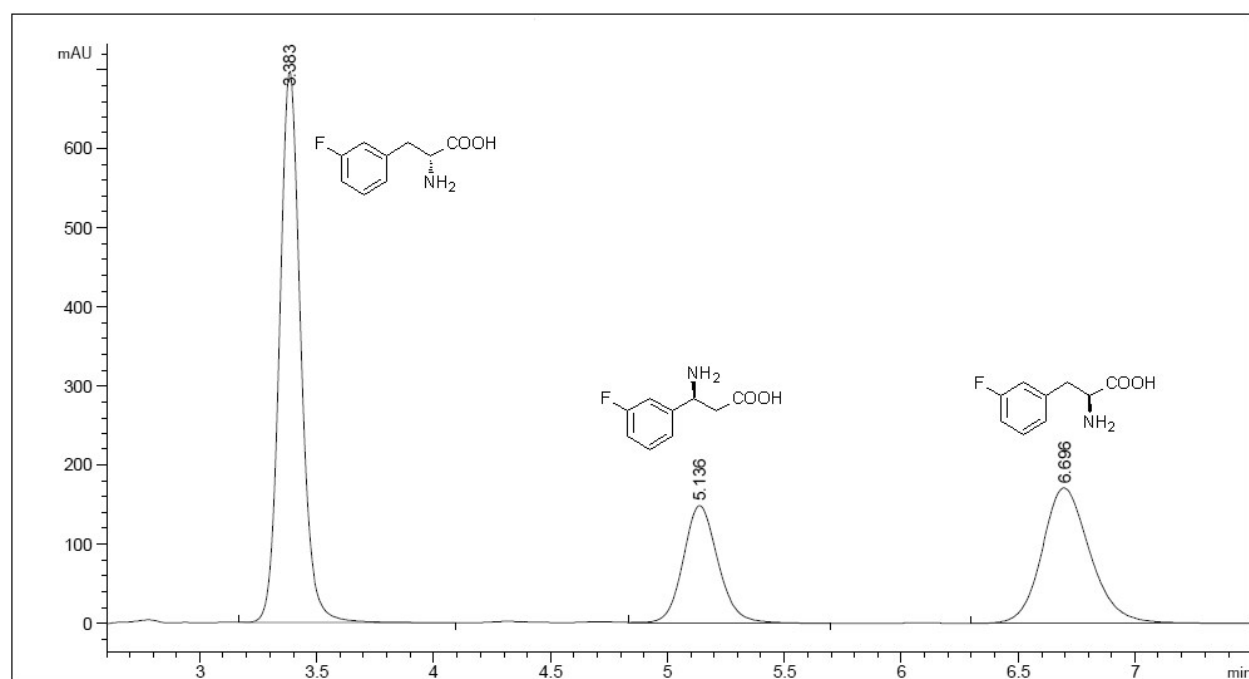

Products from (±)-3-fluoro- $\alpha$ -phenylalanine (*rac*-1e) by PaPAM after 20 h [Crownpak CR-I(+)column]

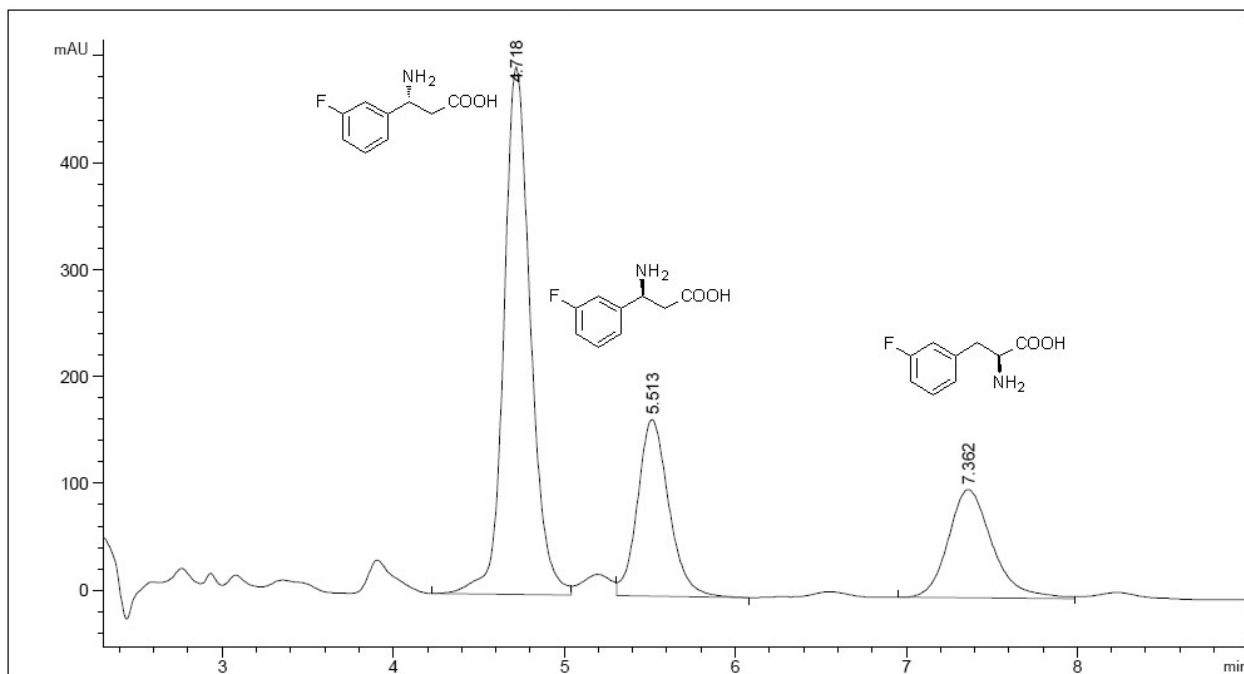

Products from (±)-3-fluoro-β-phenylalanine (*rac*-**2e**) by PaPAM after 20 h  
[Crownpak CR-I(+) column]

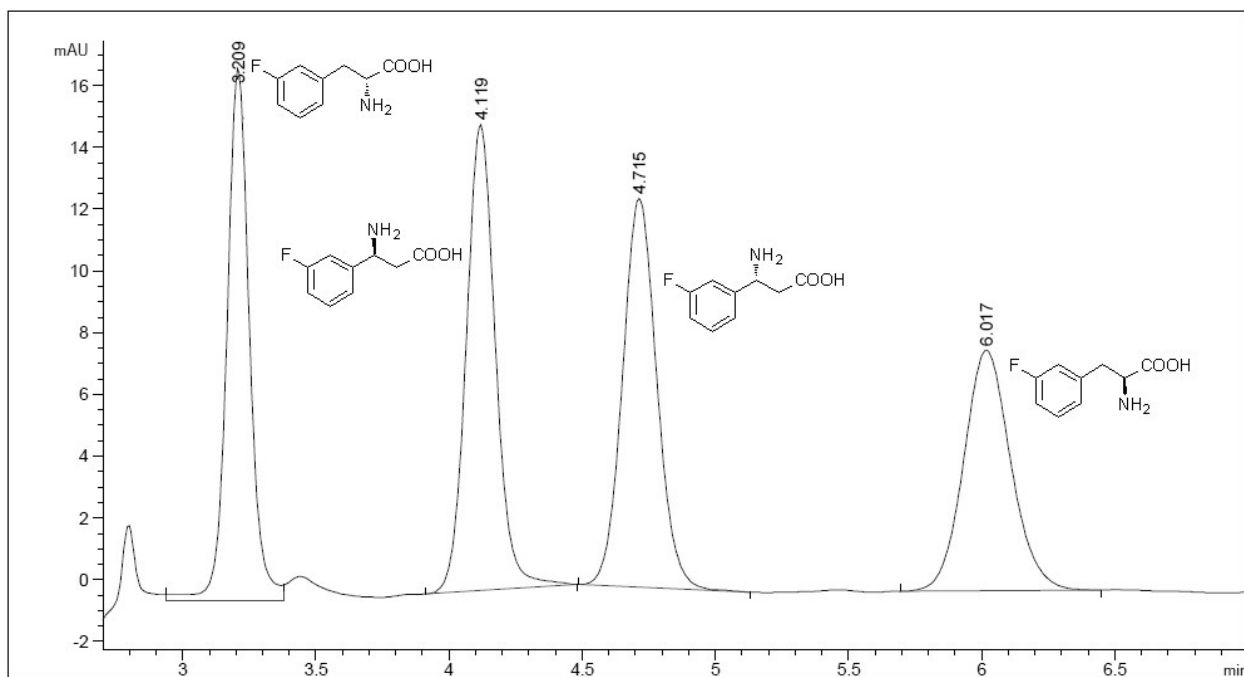

Enantioseparation of authentic (±)-3-fluoro-α-phenylalanine (*rac*-**1e**) and  
(±)-3-fluoro-β-phenylalanine (*rac*-**2e**) on Crownpak CR-I(+) column

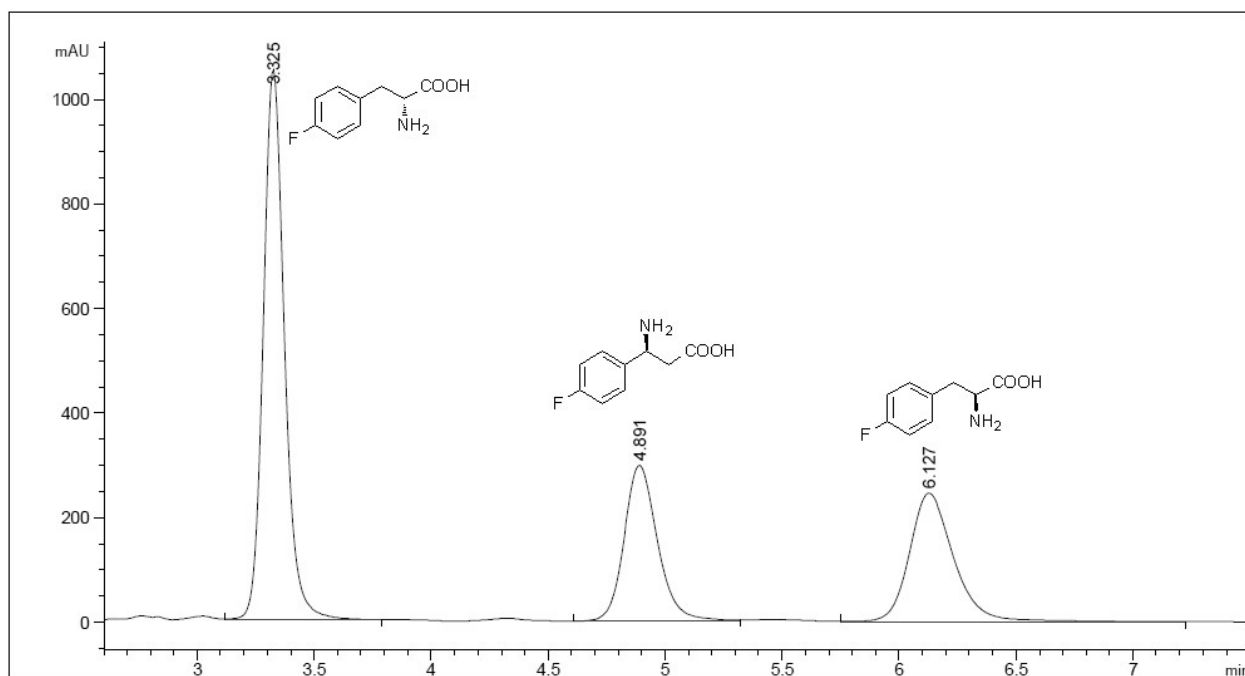

Products from (±)-4-fluoro- $\alpha$ -phenylalanine (*rac*-**1f**) by PaPAM after 20 h  
[Crownpak CR-I(+)column]

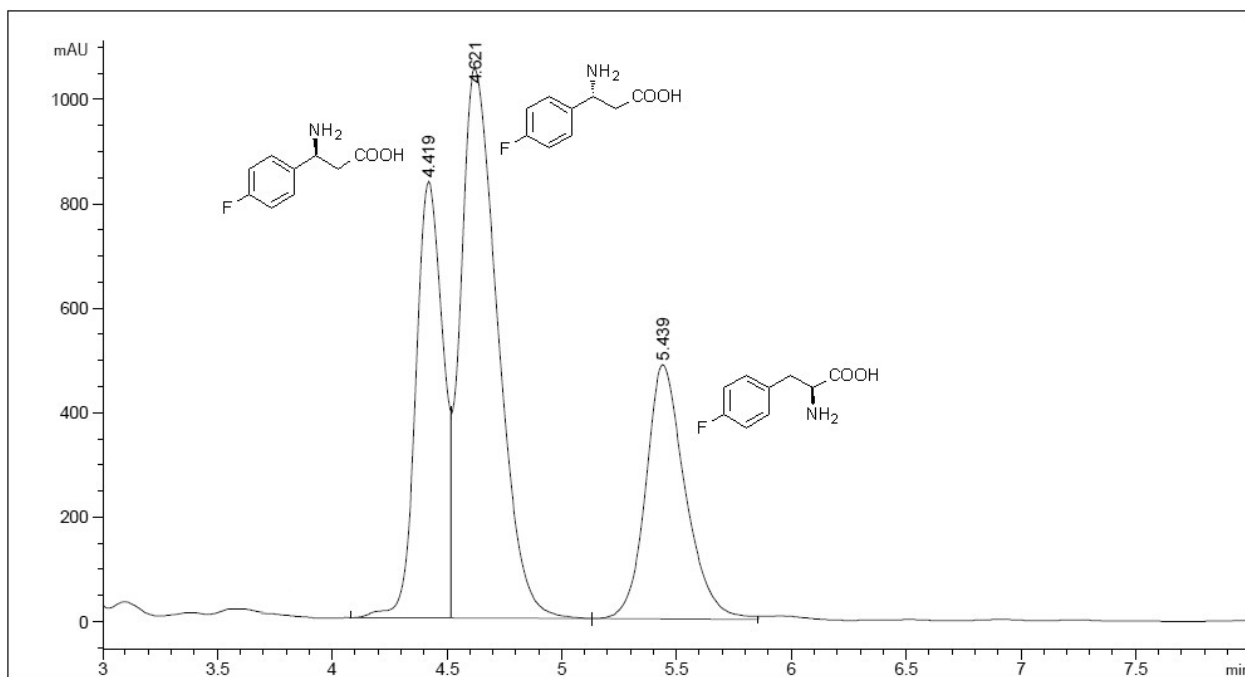

Products from (±)-4-fluoro- $\beta$ -phenylalanine (*rac*-**2f**) by PaPAM after 20 h  
[Crownpak CR-I(+) column]

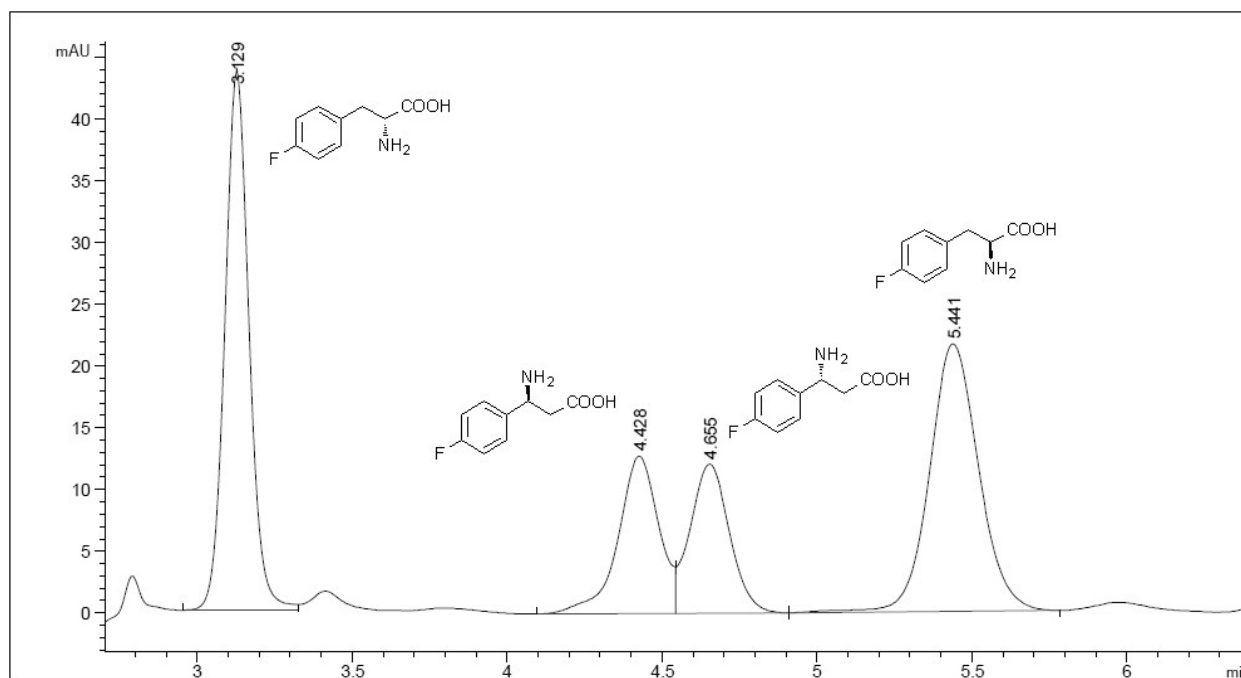

Enantioseparation of authentic (±)-4-fluoro- $\alpha$ -phenylalanine (*rac-1f*) and (±)-4-fluoro- $\beta$ -phenylalanine (*rac-2f*) on Crownpak CR-I(+)column

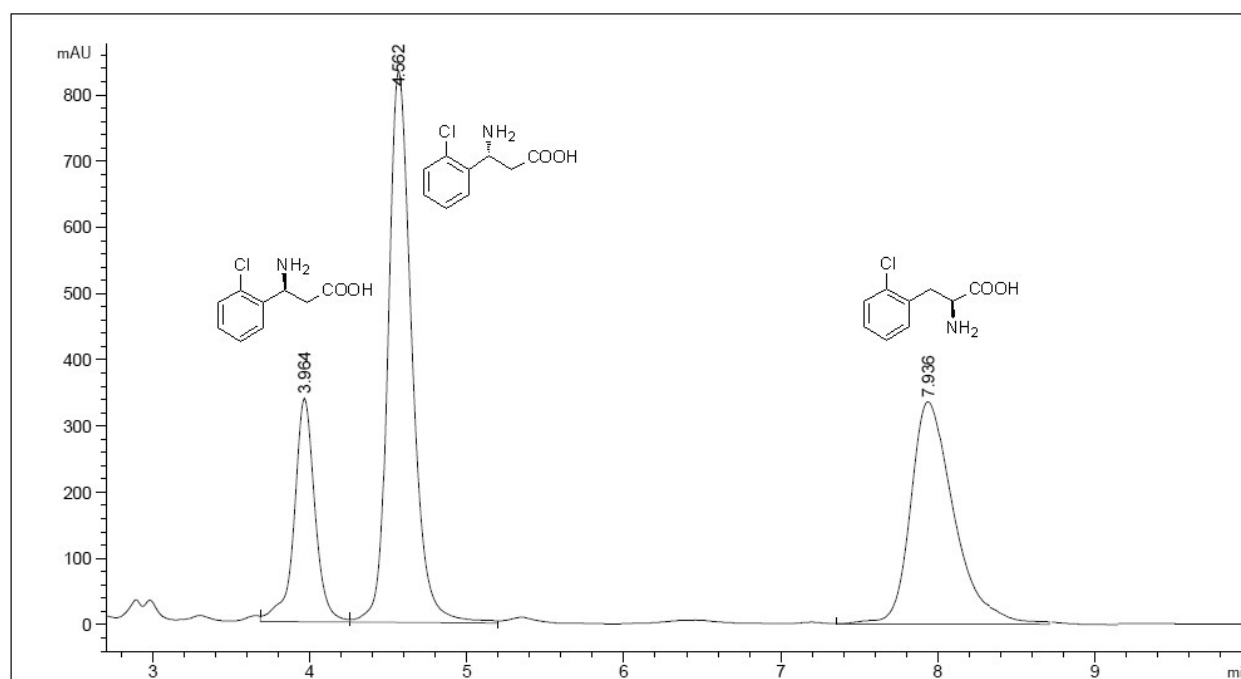

Products from (±)-2-chloro- $\beta$ -phenylalanine (*rac-2g*) by PaPAM after 20 h [Crownpak CR-I(+) column]

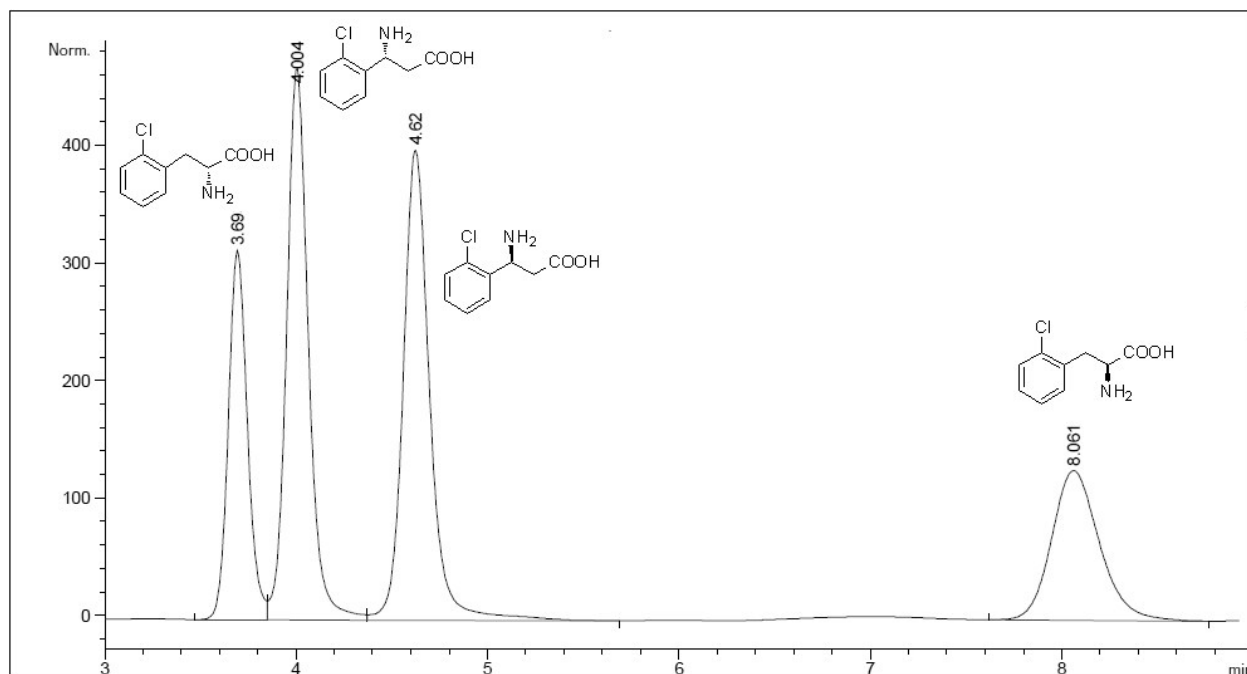

Enantioseparation of authentic (±)-2-chloro- $\alpha$ -phenylalanine (*rac-1g*) and (±)-2-chloro- $\beta$ -phenylalanine (*rac-2g*) on Crownpak CR-I(+) column

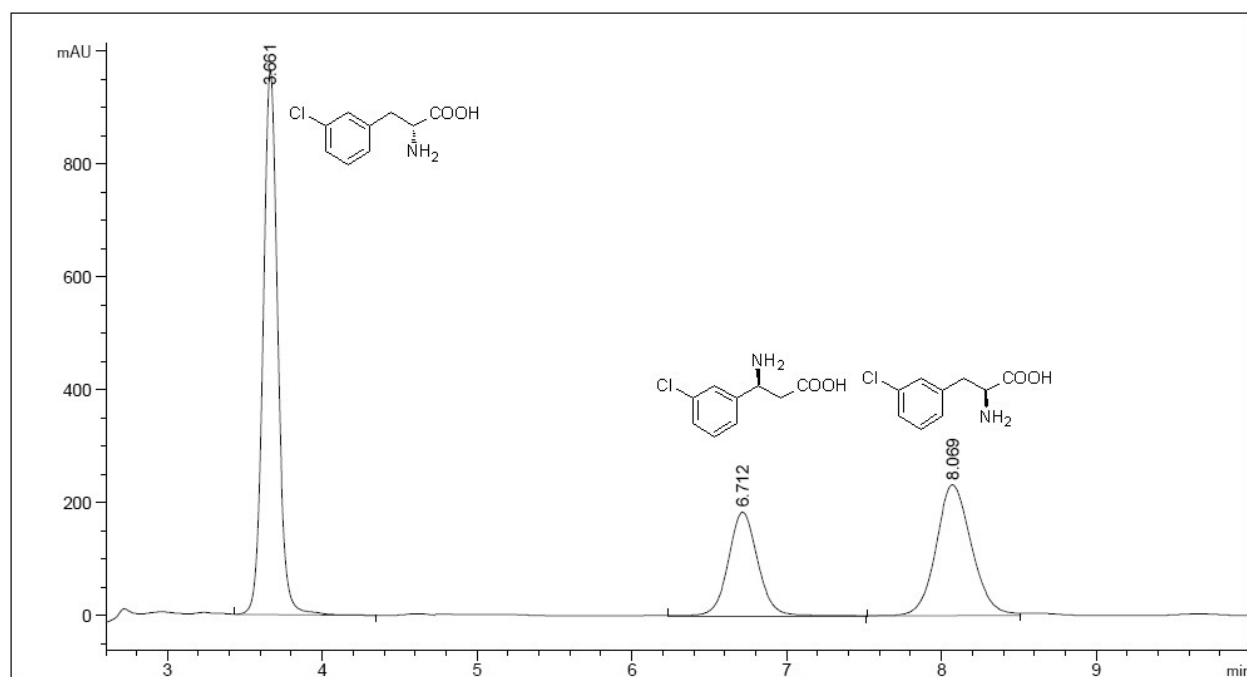

Products from (±)-3-chloro- $\alpha$ -phenylalanine (*rac-1h*) by PaPAM after 20 h [Crownpak CR-I(+)column]



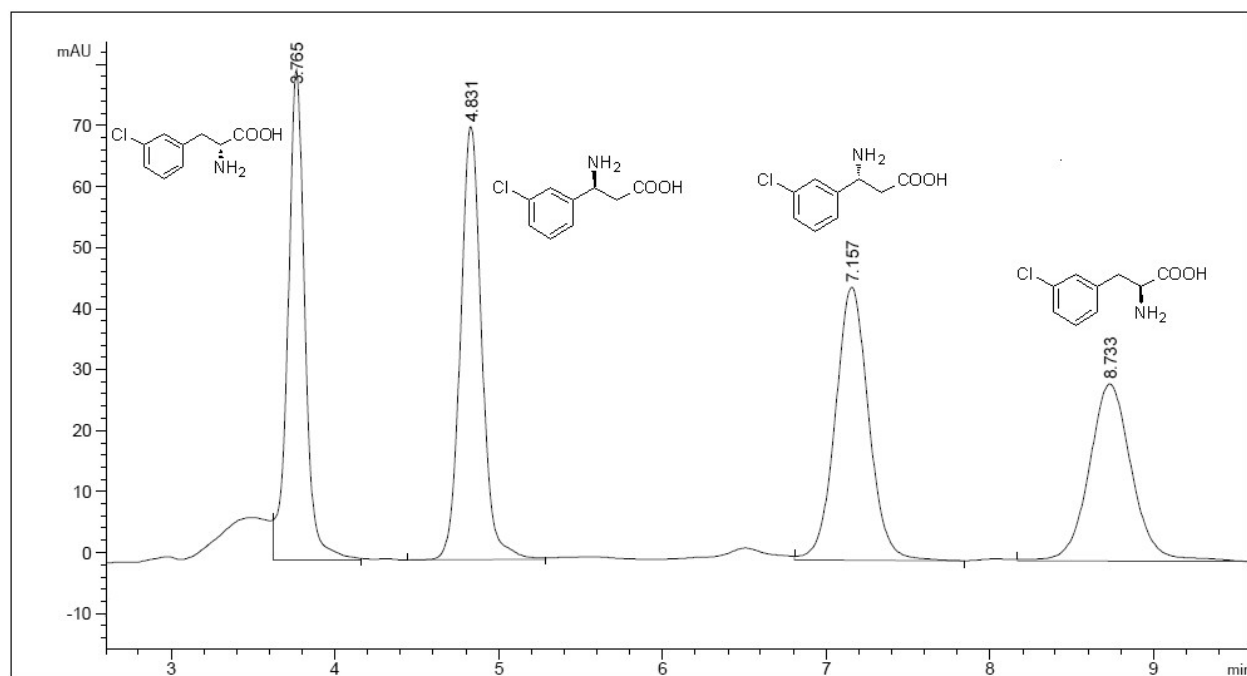

Enantioseparation of authentic (±)-3-chloro- $\alpha$ -phenylalanine (*rac*-**1f**) and (±)-3-chloro- $\beta$ -phenylalanine (*rac*-**2h**) on Crownpak CR-I(+) column

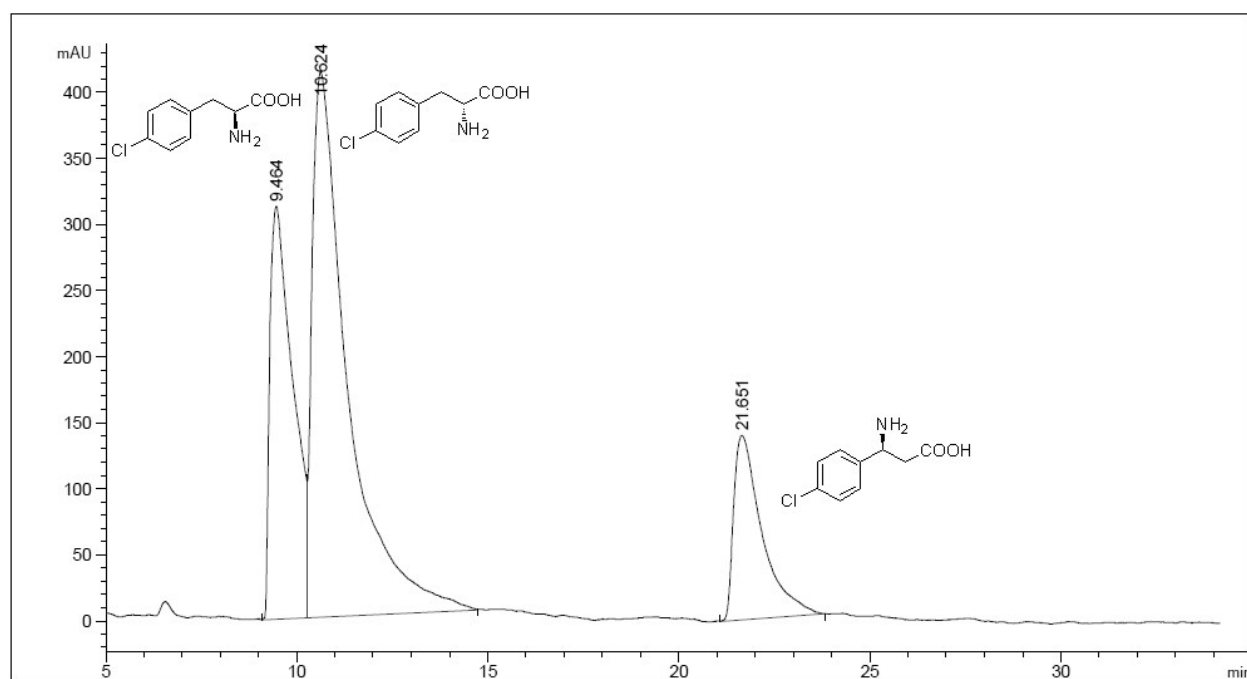

Products from (±)-4-chloro- $\alpha$ -phenylalanine (*rac*-**1i**) by PaPAM after 20 h [Chiralpak ZWIX (+) column]

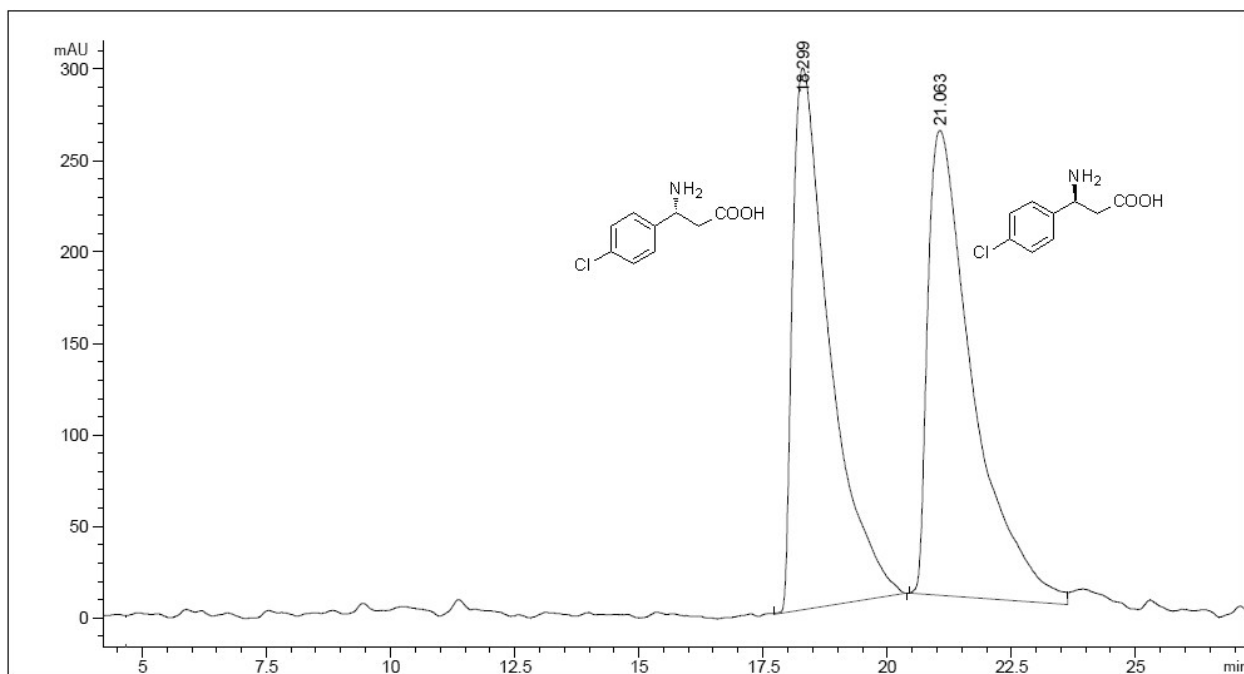

Enantioseparation of authentic (±)-4-chloro- $\alpha$ -phenylalanine (*rac*-**2i**) on Chiralpak ZWIX(+) column

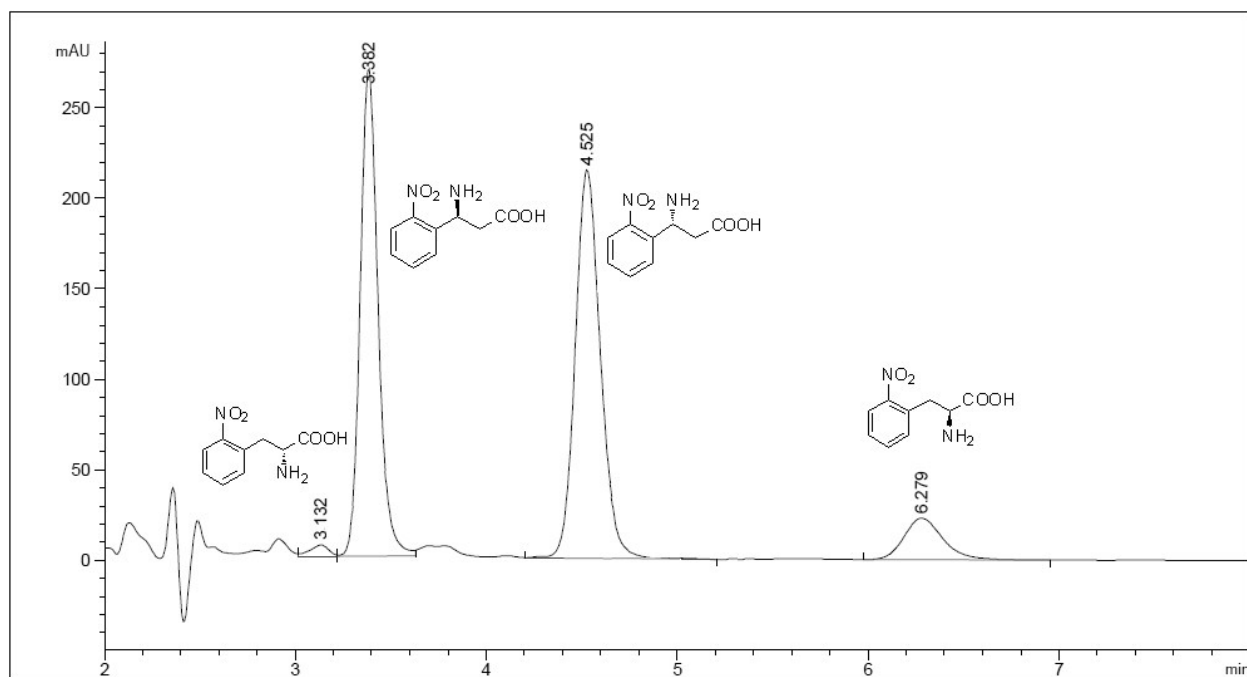

Products from (±)-4-nitro- $\beta$ -phenylalanine (*rac*-**2j**) by PaPAM after 20 h [Crownpak CR-I(+) column]

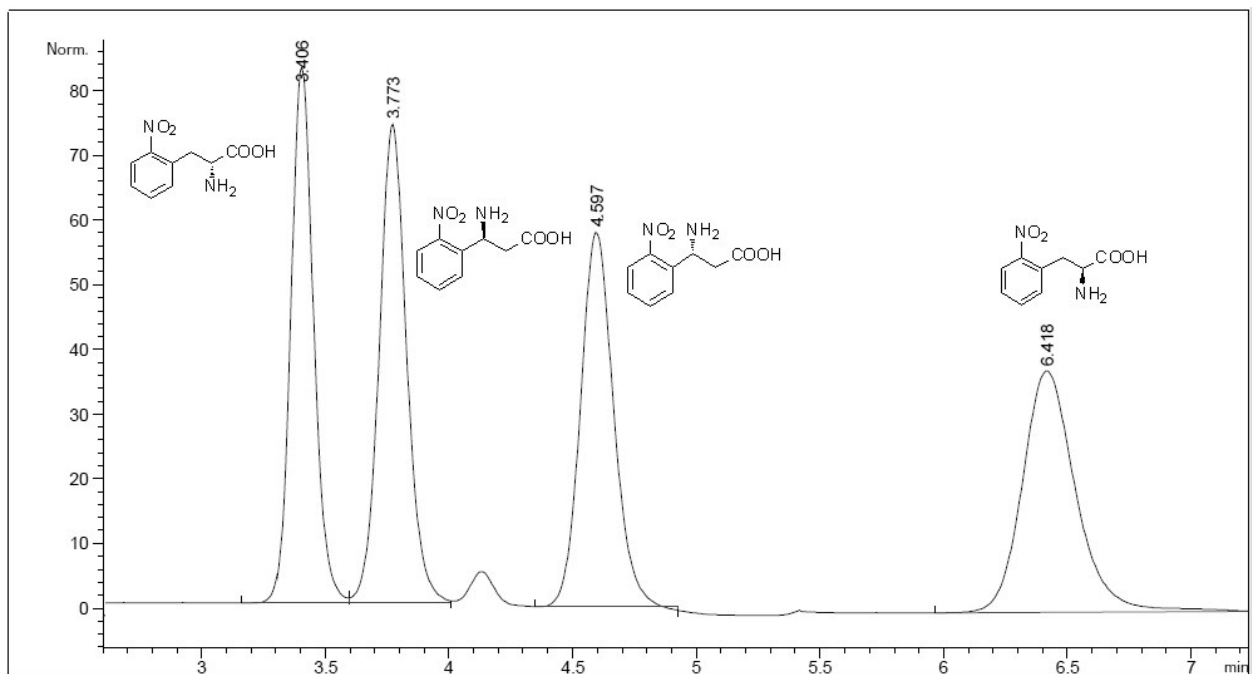

Enantioseparation of authentic (±)-4-nitro- $\alpha$ -phenylalanine (*rac*-**1j**) and (±)-4-nitro- $\beta$ -phenylalanine (*rac*-**2j**) on Crownpak CR-I(+) column

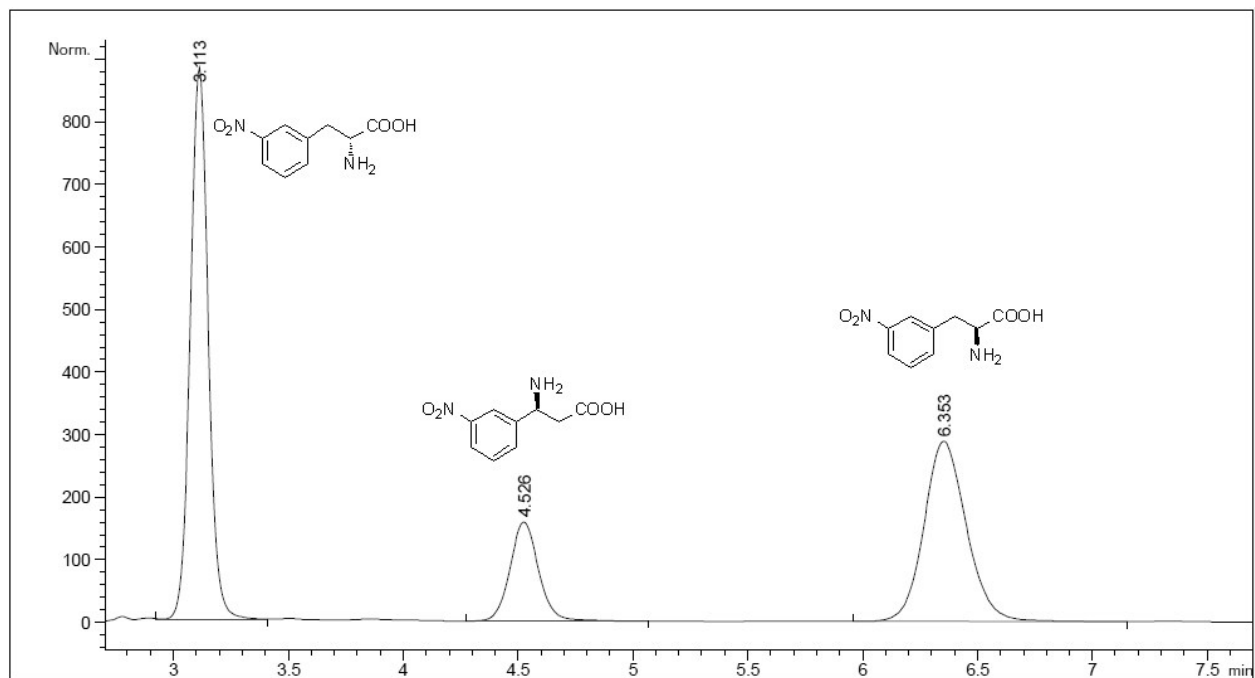

Products from (±)-3-nitro- $\alpha$ -phenylalanine (*rac*-**1k**) by PaPAM after 20 h [Crownpak CR-I(+) column]

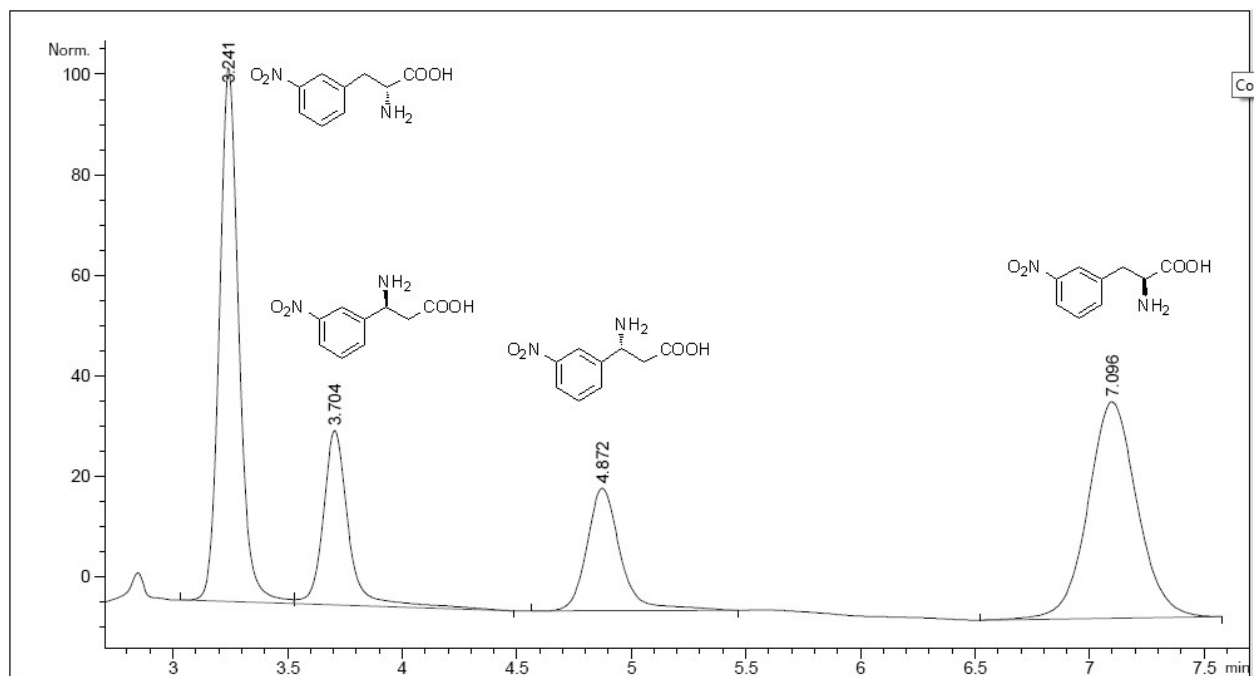

Enantioseparation of authentic ( $\pm$ )-3-nitro- $\alpha$ -phenylalanine (*rac-1k*) and ( $\pm$ )-3-nitro- $\beta$ -phenylalanine (*rac-2k*) on Crownpak CR-I(+) column

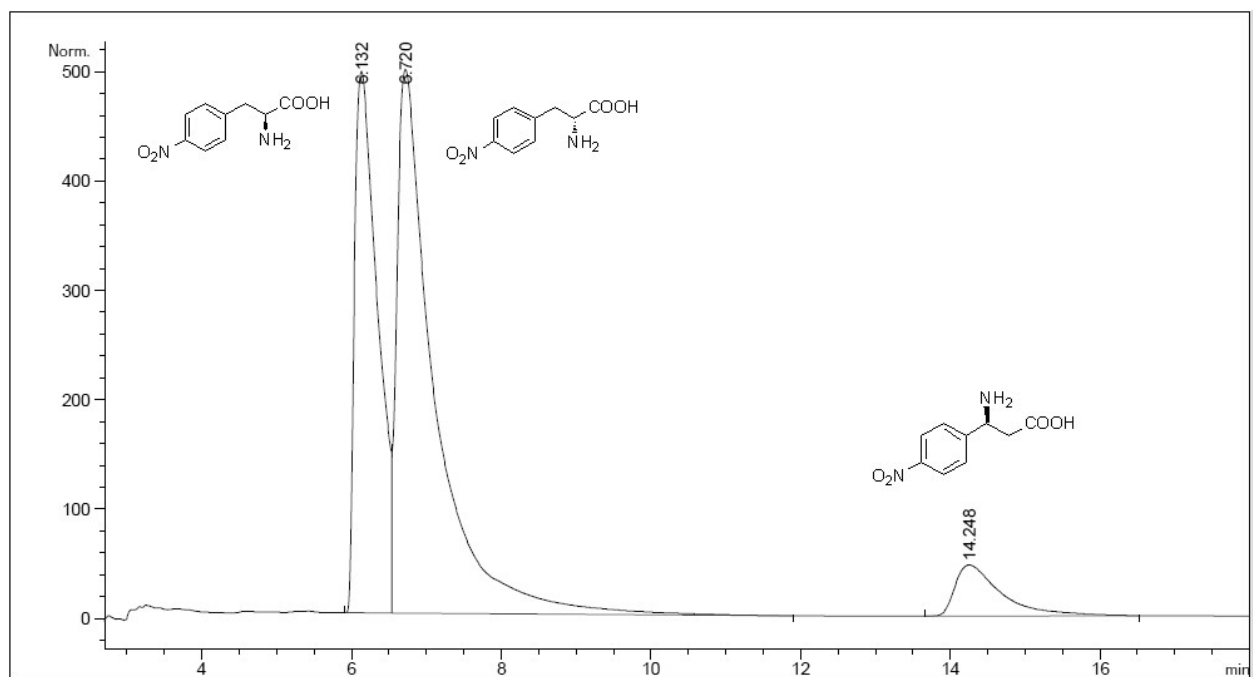

Products from ( $\pm$ )-4-nitro- $\alpha$ -phenylalanine (*rac-1l*) catalyzed by PaPAM, after 20 h [Chiralpak ZWIX(+) column]

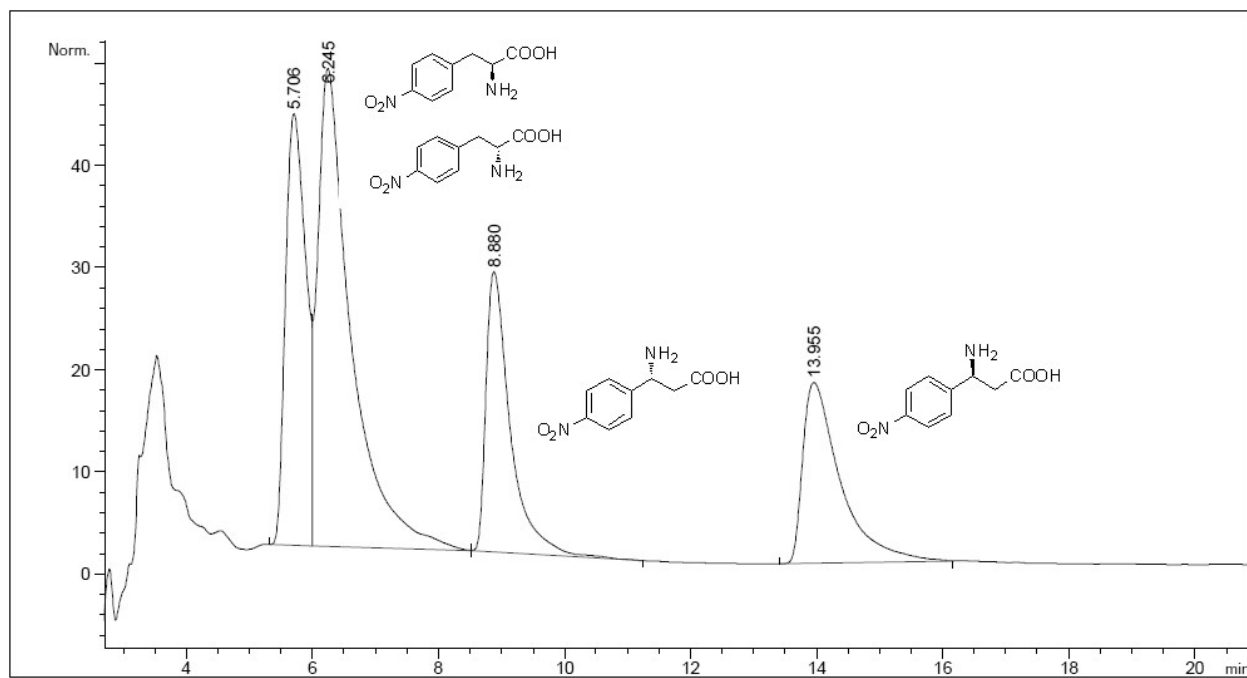

Enantioseparation of authentic (±)-4-nitro- $\alpha$ -phenylalanine (*rac-11*) and (±)-4-nitro- $\beta$ -phenylalanine (*rac-21*) on Chiralpak ZWIX(+) column

## 5. Enzymatic reaction starting from ( $\pm$ )- $\beta$ -phenylalanine **2a** and (*S*)- $\beta$ -phenylalanine (*S*)-**2a**

The time course profiles of the product formation in *Pa*PAM catalysed reactions from (*S*)- $\beta$ -phenylalanine and ( $\pm$ )- $\beta$ -phenylalanine were determined HPLC on Gemini NX-C-18 column (see Section 2.2 in the Supplementary material).

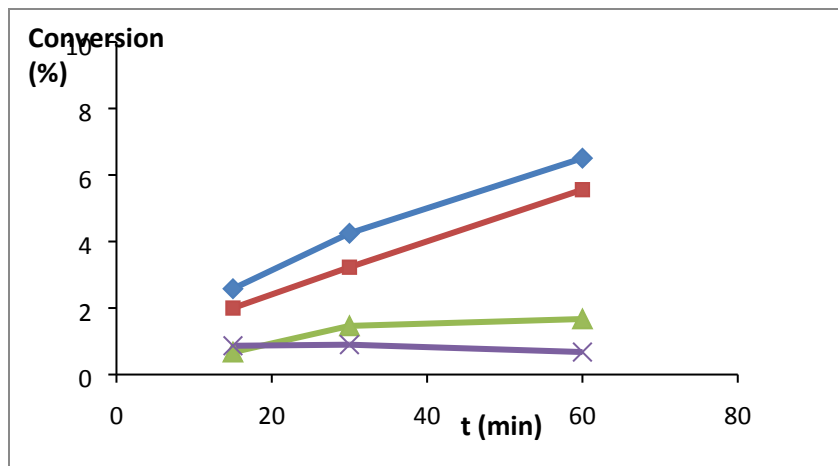

Time course profiles: (A) conversion of (*S*)- $\beta$ -phenylalanine [5 mM, (*S*)-**2a**] into (*S*)- $\alpha$ -phenylalanine [(*S*)-**1a**, ◆] and cinnamic acid (**2a**, ⊙); (B) conversion of ( $\pm$ )- $\beta$ -phenylalanine (10 mM, **2a**) into (*S*)- $\alpha$ -phenylalanine [(*S*)-**1a**, ⊗] and cinnamic acid (**2a**, ×)

## 6. SDS-PAGE analysis of the purified *Pa*PAM enzyme

The purity of the *Pa*PAM was verified by SDS-PAGE analysis. The samples were boiled for 5 min in Laemmli buffer, and were loaded on a 12% SDS-PAGE.

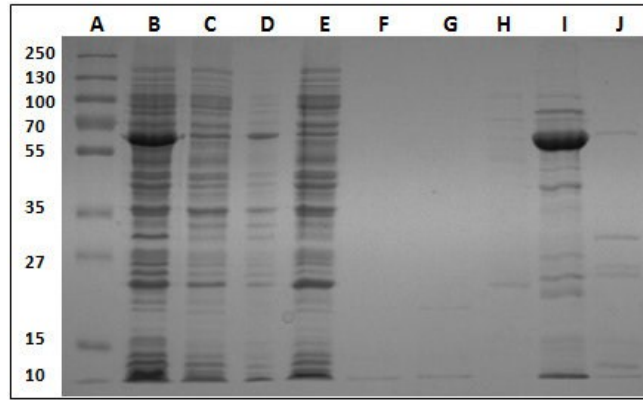

**Figure S1.** Purification of *Pa*PAM with Ni-NTA. Lane **A**: protein ladder, Lane **B**: supernatant, Lane **C**: flow through, Lane **D**: pellet, Lane **E**: LS1, Lane **F**: HS, Lane **G**: LS2, Lane **H**: 20 mM Imidazole, Lane **I**: 350 mM Imidazole, Lane **J**: 1 mM Imidazole. The samples were prepared as described in experimental section.
